# Supplementary material for: Expeditious synthetic approach and photophysical properties of fluorescent benzimidazo[1,2-d]dibenzo[b,f][1,4]diazepine derivatives
Source: Royal Society of Chemistry journal article supplement (doi:10.1039/c2ra22527a), 2012-11-22
Supplement: c2ra22527a.pdf [file c2ra22527a.pdf]

## Expeditious Synthetic Approach and Photophysical Properties of Fluorescent Benzimidazo[1,2-d]dibenzo[b,f][1,4]diazepine derivatives

Sudipta Mitra<sup>a</sup>, Nitin Chattopadhyay<sup>b</sup> and Partha Chattopadhyay<sup>a\*</sup>

<sup>a</sup>Chemistry Division, CSIR Indian Institute of Chemical Biology, 4 Raja S.C. Mullick  
Road, Kolkata – 700 032, India

<sup>b</sup>Department of Chemistry, Jadavpur University, Kolkata – 700 032, India

Corresponding author: Telephone: 91-33-2473 0492. Fax: +91 33 2473 5197. Email:  
[partha@iicb.res.in](mailto:partha@iicb.res.in).

### Supplementary Information

|                   |                                        |   |
|-------------------|----------------------------------------|---|
| <b>Figure S1</b>  | <sup>1</sup> H NMR of <b>4a</b> .....  | 4 |
| <b>Figure S2</b>  | <sup>13</sup> C NMR of <b>4a</b> ..... | 4 |
| <b>Figure S3</b>  | <sup>1</sup> H NMR of <b>4b</b> .....  | 5 |
| <b>Figure S4</b>  | <sup>13</sup> C NMR of <b>4b</b> ..... | 5 |
| <b>Figure S5</b>  | <sup>1</sup> H NMR of <b>4c</b> .....  | 6 |
| <b>Figure S6</b>  | <sup>13</sup> C NMR of <b>4c</b> ..... | 6 |
| <b>Figure S7</b>  | <sup>1</sup> H NMR of <b>4d</b> .....  | 7 |
| <b>Figure S8</b>  | <sup>13</sup> C NMR of <b>4d</b> ..... | 7 |
| <b>Figure S9</b>  | <sup>1</sup> H NMR of <b>4e</b> .....  | 8 |
| <b>Figure S10</b> | <sup>13</sup> C NMR of <b>4e</b> ..... | 8 |

|                   |                                                         |    |
|-------------------|---------------------------------------------------------|----|
| <b>Figure S11</b> | $^1\text{H}$ - $^1\text{H}$ COSY NMR of <b>4e</b> ..... | 9  |
| <b>Figure S12</b> | NOESY NMR of <b>4e</b> .....                            | 9  |
| <b>Figure S13</b> | $^1\text{H}$ NMR of <b>4f</b> .....                     | 10 |
| <b>Figure S14</b> | $^{13}\text{C}$ NMR of <b>4f</b> .....                  | 10 |
| <b>Figure S15</b> | $^1\text{H}$ NMR of <b>4g</b> .....                     | 11 |
| <b>Figure S16</b> | $^{13}\text{C}$ NMR of <b>4g</b> .....                  | 11 |
| <b>Figure S17</b> | $^1\text{H}$ NMR of <b>4h</b> .....                     | 12 |
| <b>Figure S18</b> | $^{13}\text{C}$ NMR of <b>4h</b> .....                  | 12 |
| <b>Figure S19</b> | $^1\text{H}$ NMR of <b>3a</b> .....                     | 13 |
| <b>Figure S20</b> | $^{13}\text{C}$ NMR of <b>3a</b> .....                  | 13 |
| <b>Figure S21</b> | $^1\text{H}$ NMR of <b>3b</b> .....                     | 14 |
| <b>Figure S22</b> | $^{13}\text{C}$ NMR of <b>3b</b> .....                  | 14 |
| <b>Figure S23</b> | $^1\text{H}$ NMR of <b>3c</b> .....                     | 15 |
| <b>Figure S24</b> | $^{13}\text{C}$ NMR of <b>3c</b> .....                  | 15 |
| <b>Figure S25</b> | $^1\text{H}$ NMR of <b>3d</b> .....                     | 16 |
| <b>Figure S26</b> | $^{13}\text{C}$ NMR of <b>3d</b> .....                  | 16 |
| <b>Figure S27</b> | $^1\text{H}$ NMR of <b>3e</b> .....                     | 17 |
| <b>Figure S28</b> | $^{13}\text{C}$ NMR of <b>3e</b> .....                  | 17 |
| <b>Figure S29</b> | $^1\text{H}$ NMR of <b>3f</b> .....                     | 18 |
| <b>Figure S30</b> | $^{13}\text{C}$ NMR of <b>3f</b> .....                  | 18 |
| <b>Figure S31</b> | $^1\text{H}$ NMR of <b>3g</b> .....                     | 19 |
| <b>Figure S32</b> | $^{13}\text{C}$ NMR of <b>3g</b> .....                  | 19 |

|                   |                                        |    |
|-------------------|----------------------------------------|----|
| <b>Figure S33</b> | $^1\text{H}$ NMR of <b>3h</b> .....    | 20 |
| <b>Figure S34</b> | $^{13}\text{C}$ NMR of <b>3h</b> ..... | 20 |
| <b>Figure S35</b> | $^1\text{H}$ NMR of <b>2a</b> .....    | 21 |
| <b>Figure S36</b> | $^{13}\text{C}$ NMR of <b>2a</b> ..... | 21 |
| <b>Figure S37</b> | $^1\text{H}$ NMR of <b>2b</b> .....    | 22 |
| <b>Figure S38</b> | $^{13}\text{C}$ NMR of <b>2b</b> ..... | 22 |
| <b>Figure S39</b> | $^1\text{H}$ NMR of <b>2c</b> .....    | 23 |
| <b>Figure S40</b> | $^{13}\text{C}$ NMR of <b>2c</b> ..... | 23 |
| <b>Figure S41</b> | $^1\text{H}$ NMR of <b>2d</b> .....    | 24 |
| <b>Figure S42</b> | $^{13}\text{C}$ NMR of <b>2d</b> ..... | 24 |
| <b>Figure S43</b> | $^1\text{H}$ NMR of <b>2f</b> .....    | 25 |
| <b>Figure S44</b> | $^{13}\text{C}$ NMR of <b>2f</b> ..... | 25 |
| <b>Figure S45</b> | $^1\text{H}$ NMR of <b>2g</b> .....    | 26 |
| <b>Figure S46</b> | $^{13}\text{C}$ NMR of <b>2g</b> ..... | 26 |
| <b>Figure S47</b> | $^1\text{H}$ NMR of <b>2h</b> .....    | 27 |
| <b>Figure S48</b> | $^{13}\text{C}$ NMR of <b>2h</b> ..... | 27 |

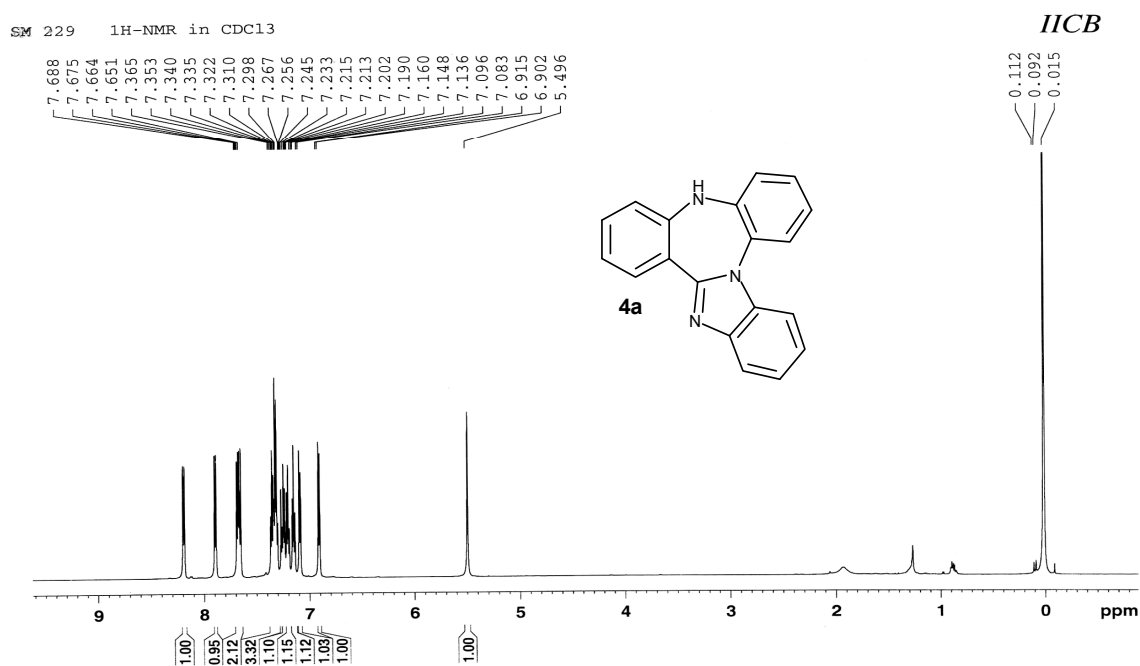

Figure S1 <sup>1</sup>H NMR of **4a**

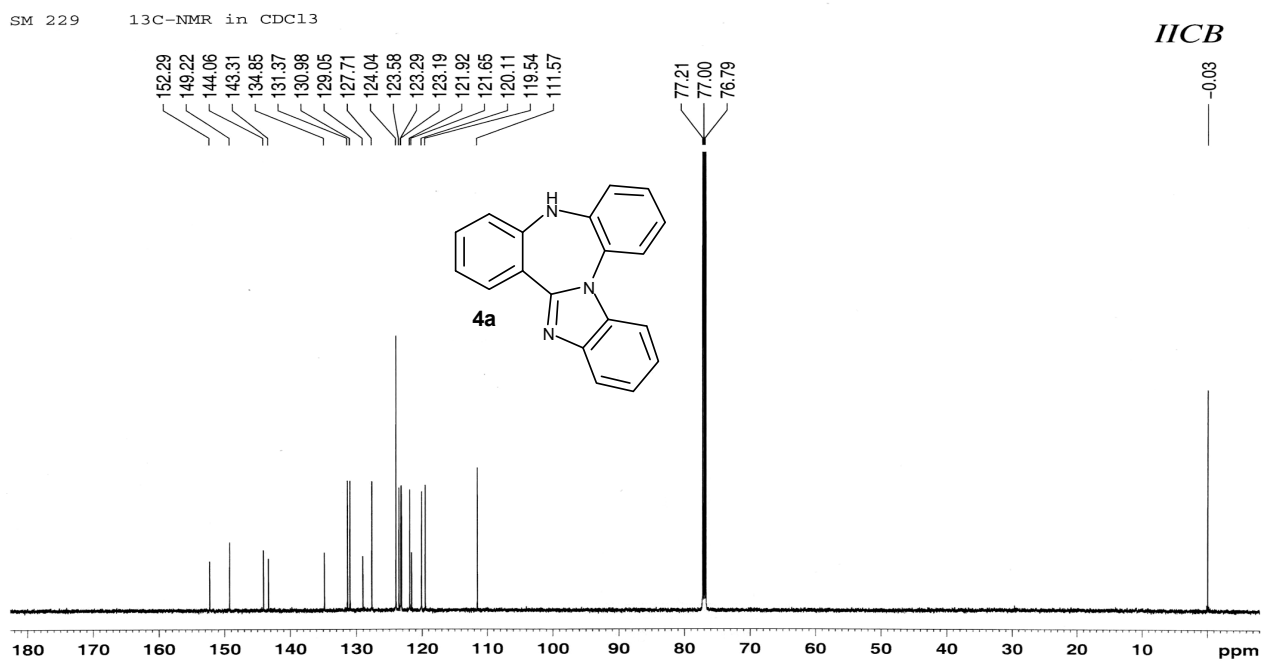

Figure S2 <sup>13</sup>C NMR of **4a**

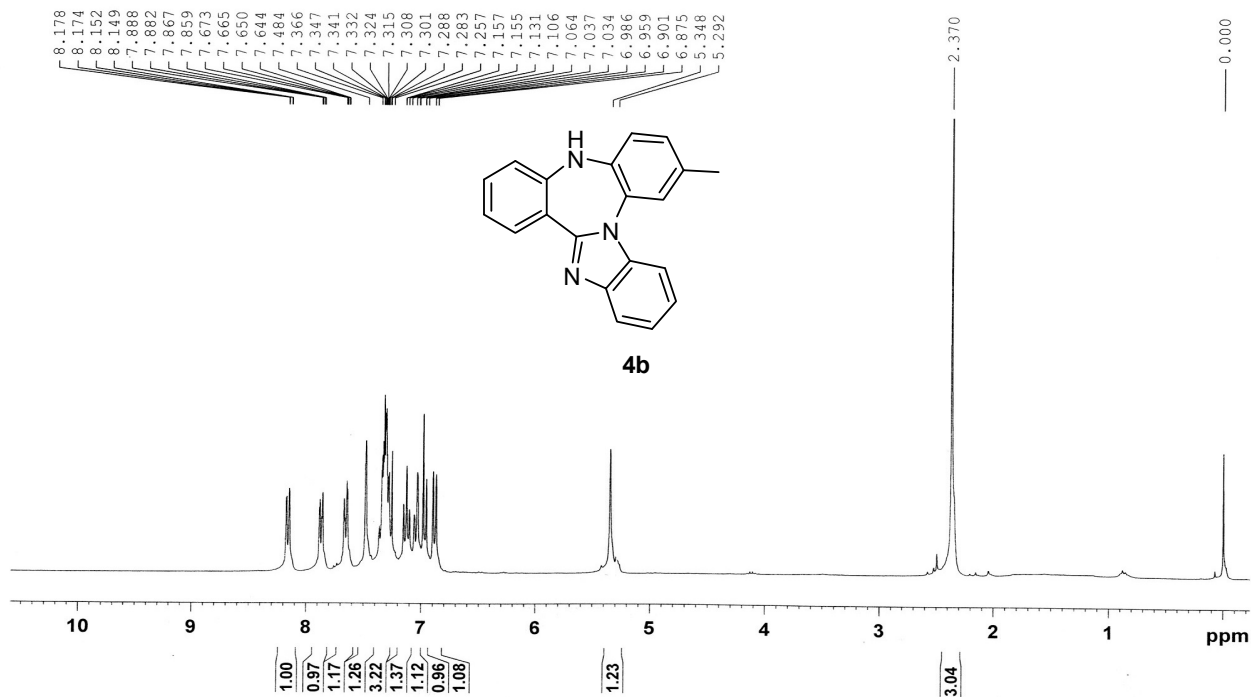

**Figure S3**  $^1\text{H NMR}$  of **4b**

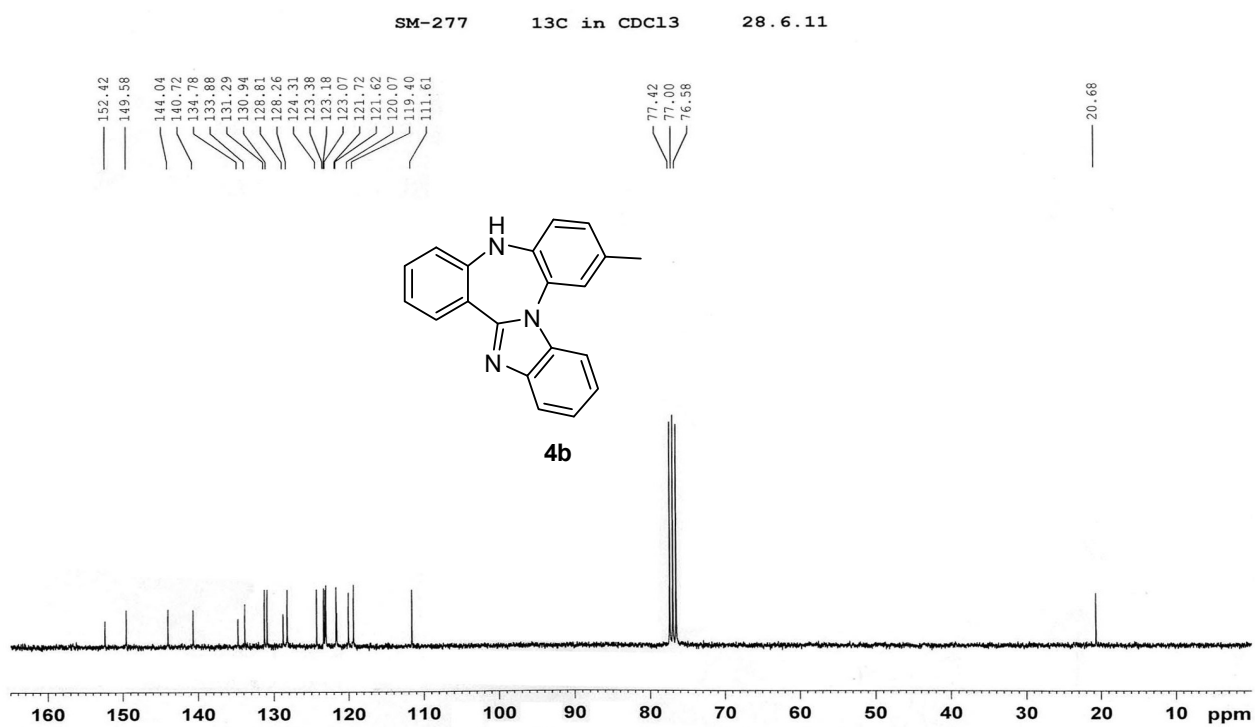

**Figure S4**  $^{13}\text{C NMR}$  of **4b**

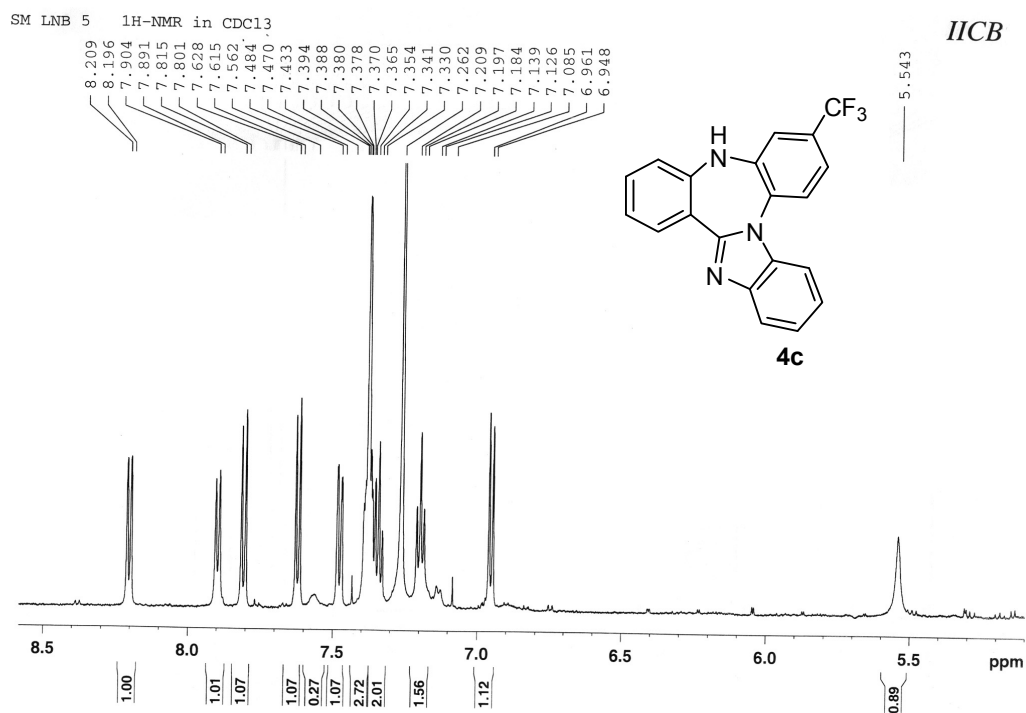

Figure S5 <sup>1</sup>H NMR of **4c**

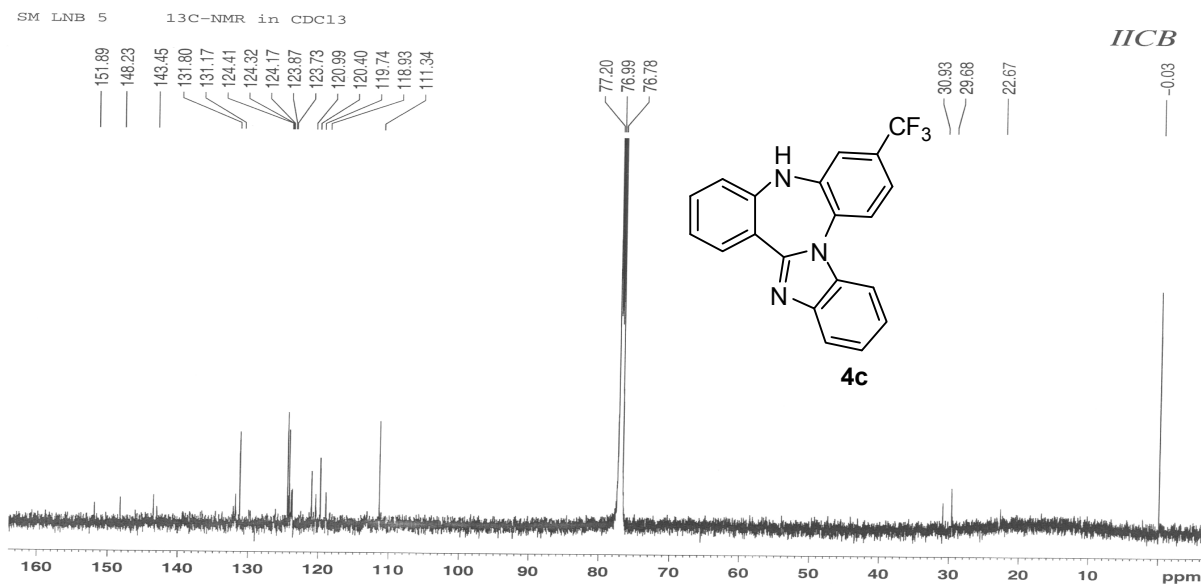

Figure S6 <sup>13</sup>C NMR of **4c**

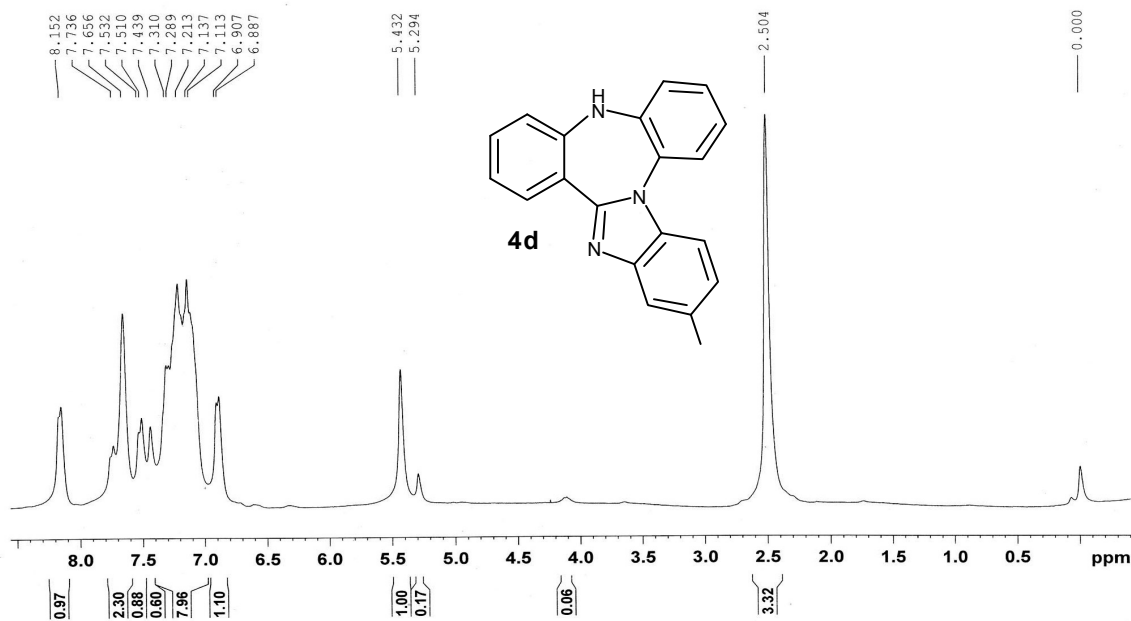

**Figure S7**  $^1\text{H}$  NMR of **4d**

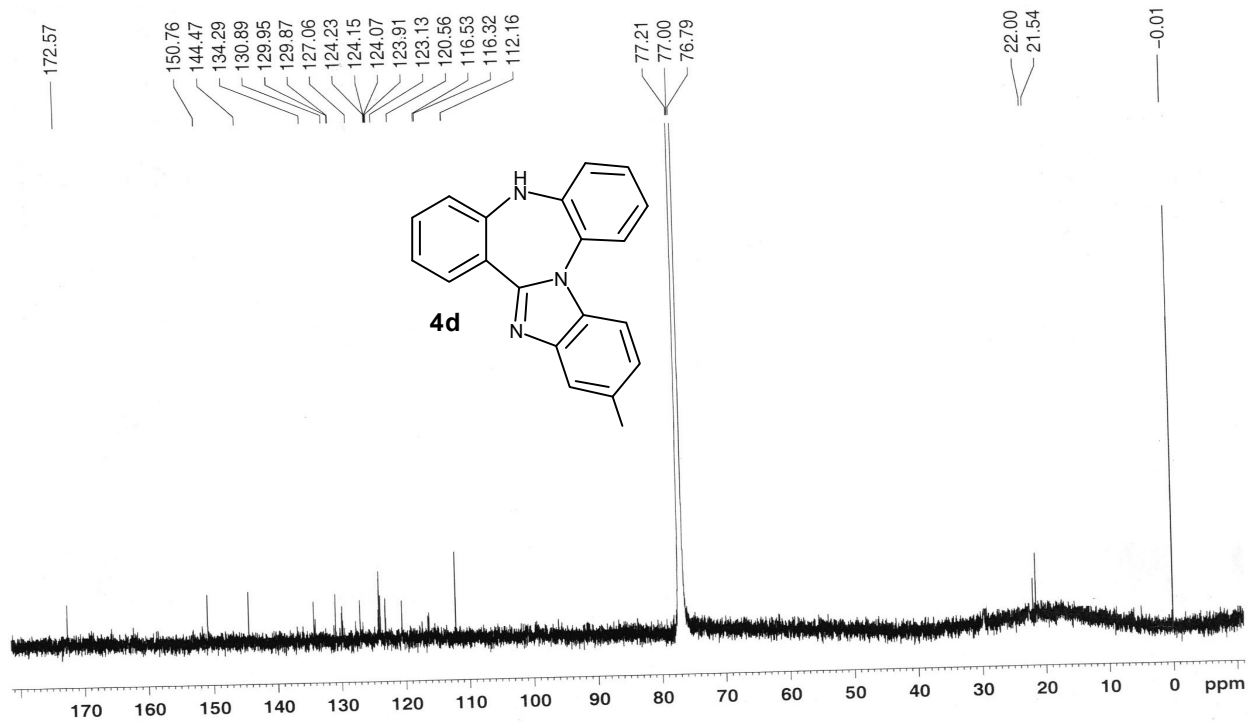

**Figure S8**  $^{13}\text{C}$  NMR of **4d**

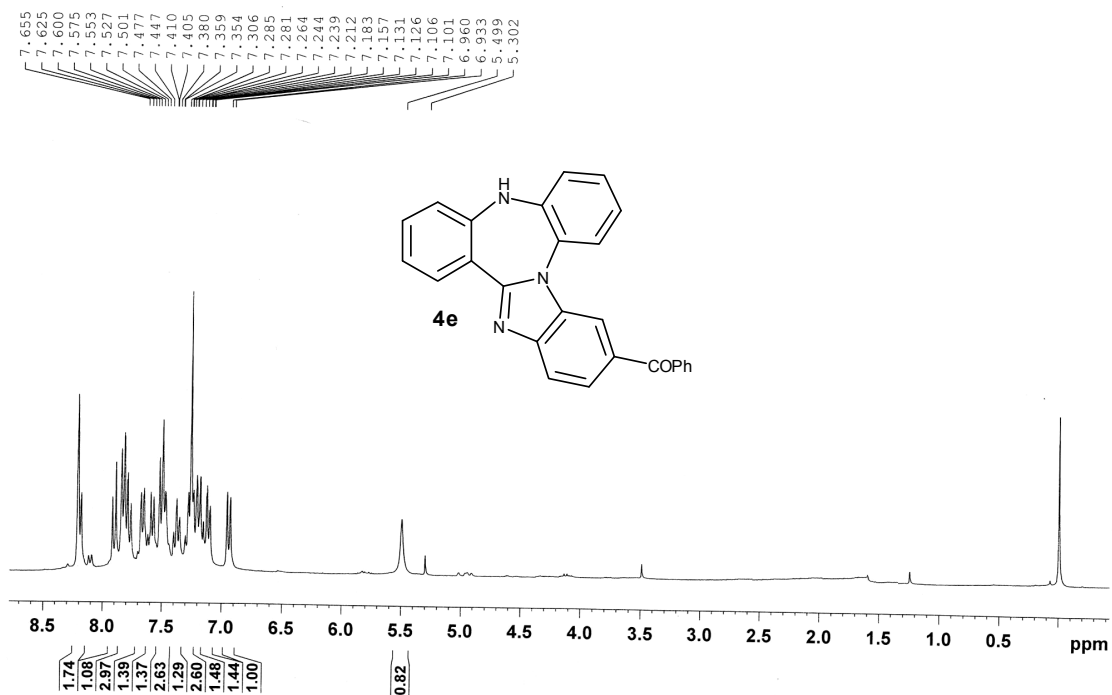

Figure S9  $^1\text{H}$  NMR of **4e**

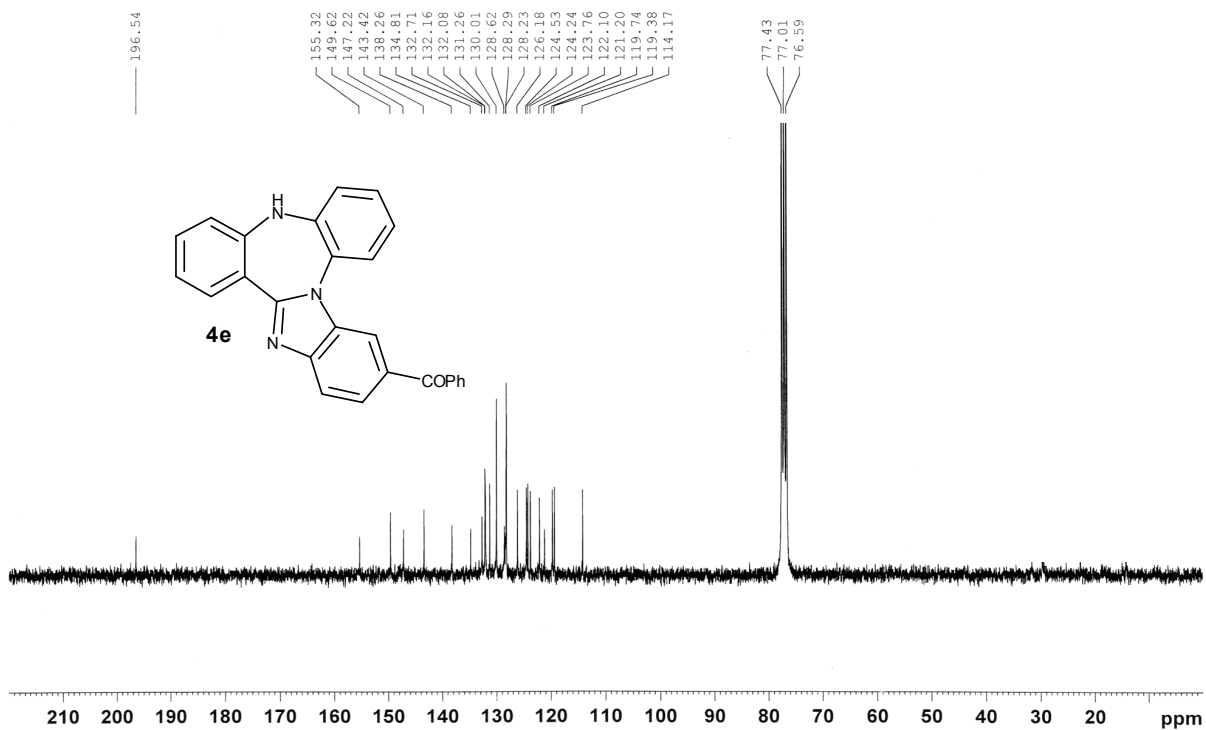

Figure S10  $^{13}\text{C}$  NMR of **4e**



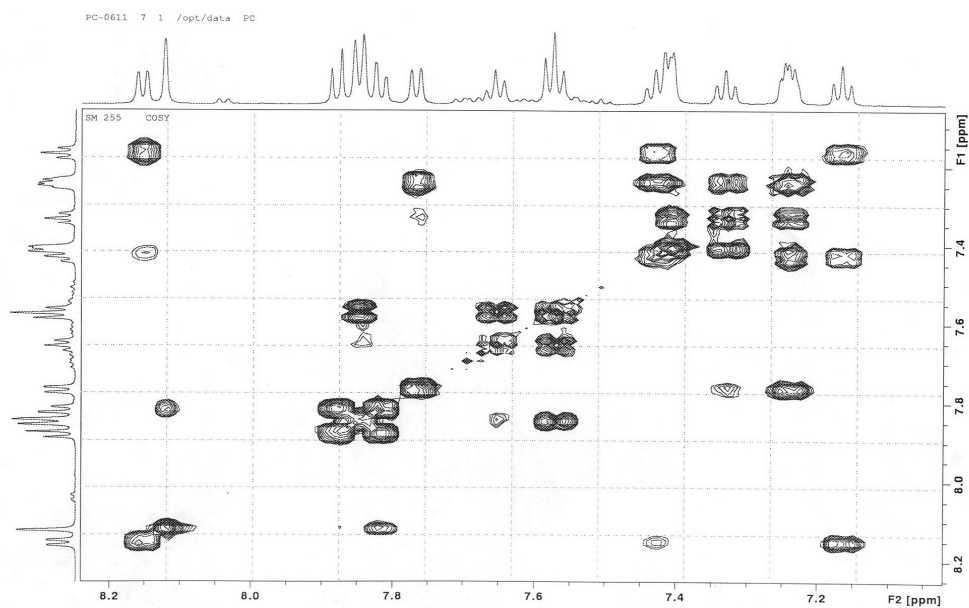

**Figure S11**  $^1\text{H}$ - $^1\text{H}$  COSY NMR of **4e**

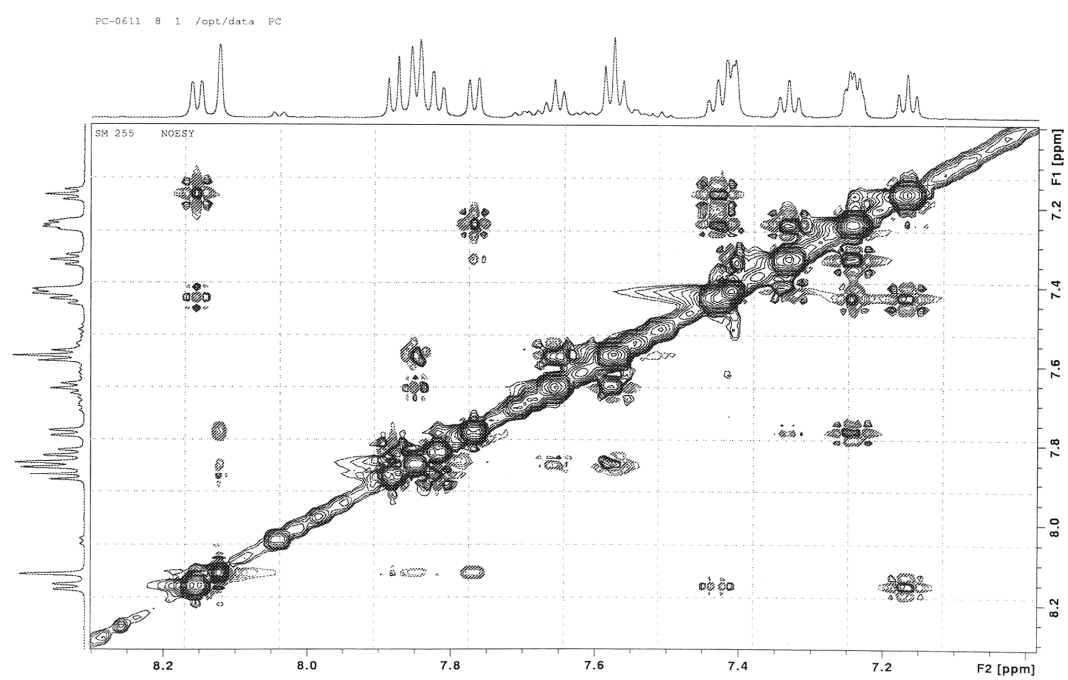

**Figure S12** NOESY NMR of **4e**

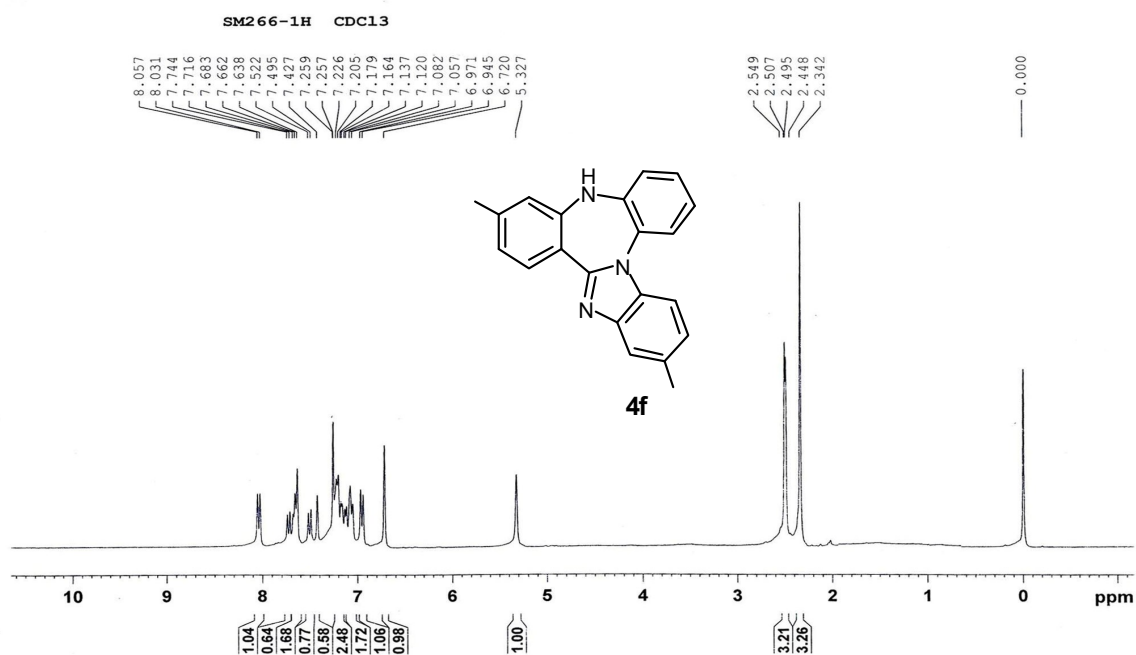

Figure S13  $^1\text{H}$  NMR of **4f**

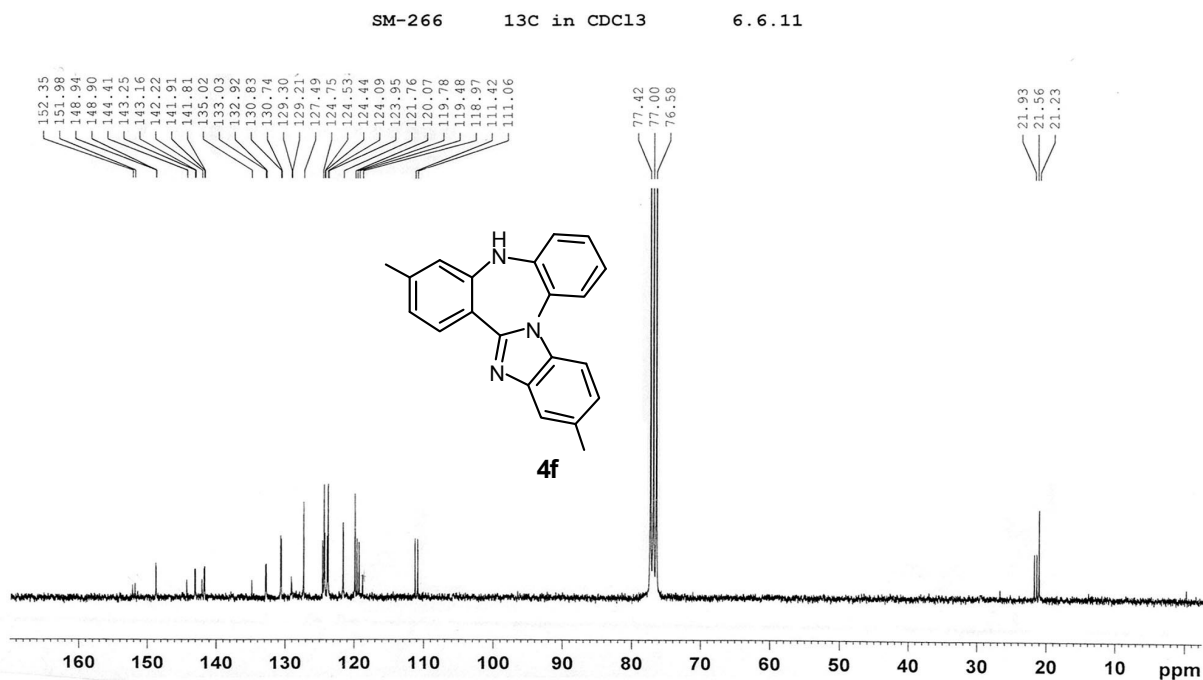

Figure S14  $^{13}\text{C}$  NMR of **4f**

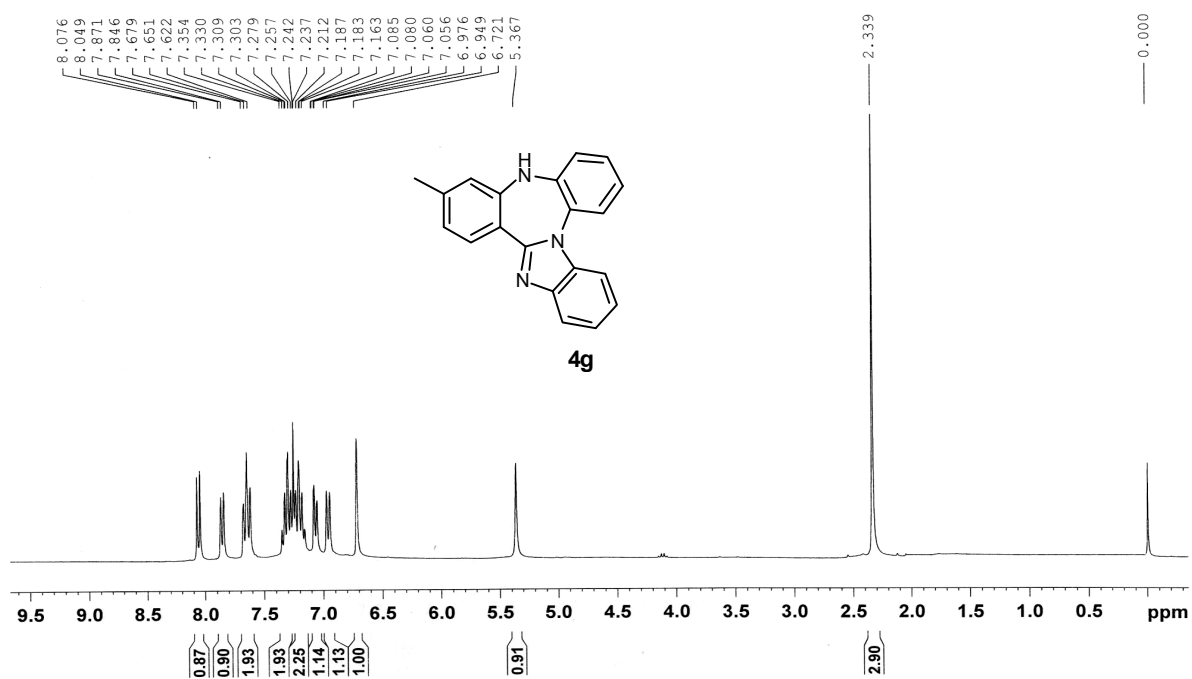

**Figure S15**  $^1\text{H}$  NMR of **4g**

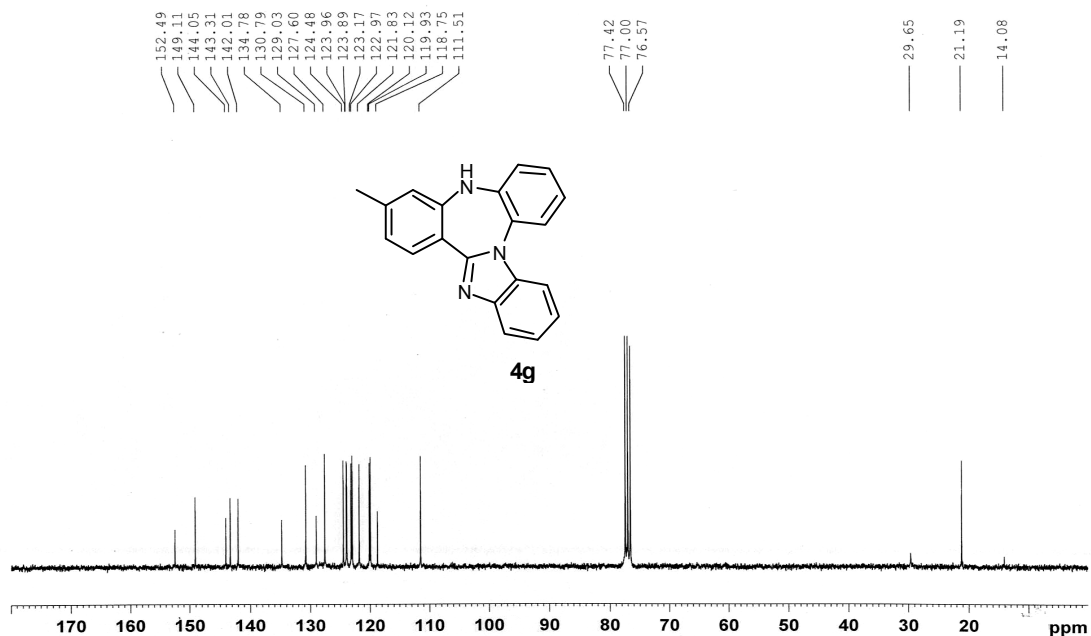

**Figure S16**  $^{13}\text{C}$  NMR of **4g**

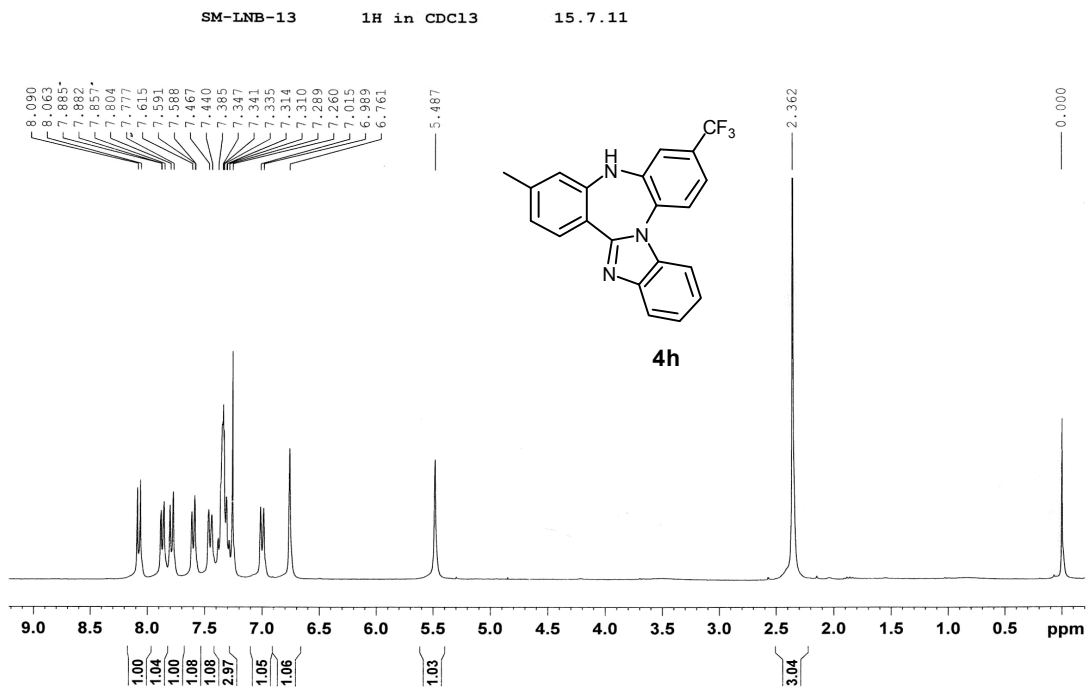

Figure S17 <sup>1</sup>H NMR of **4h**

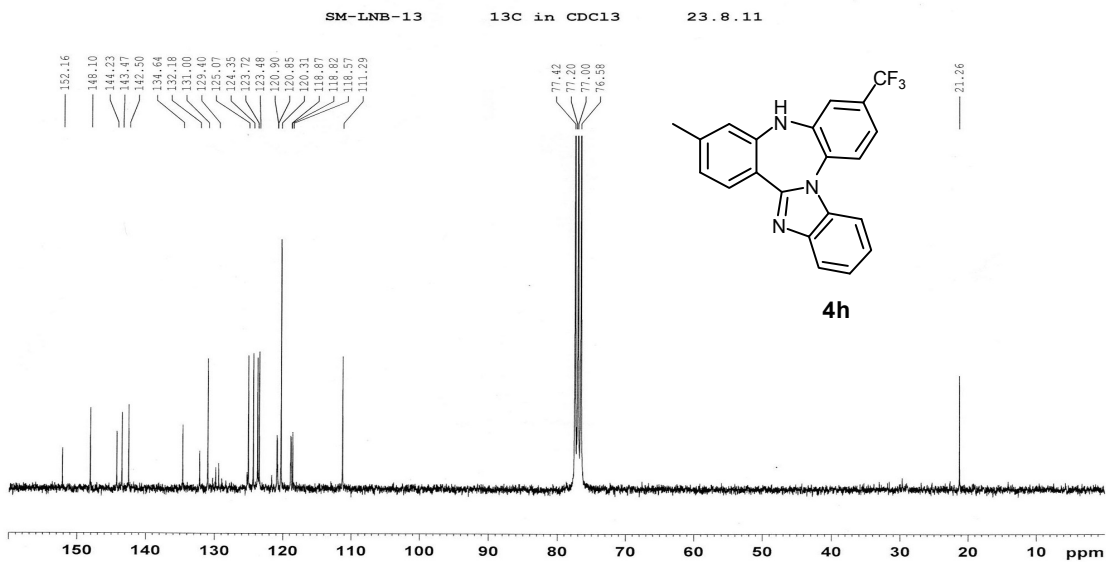

Figure S18 <sup>13</sup>C NMR of **4h**

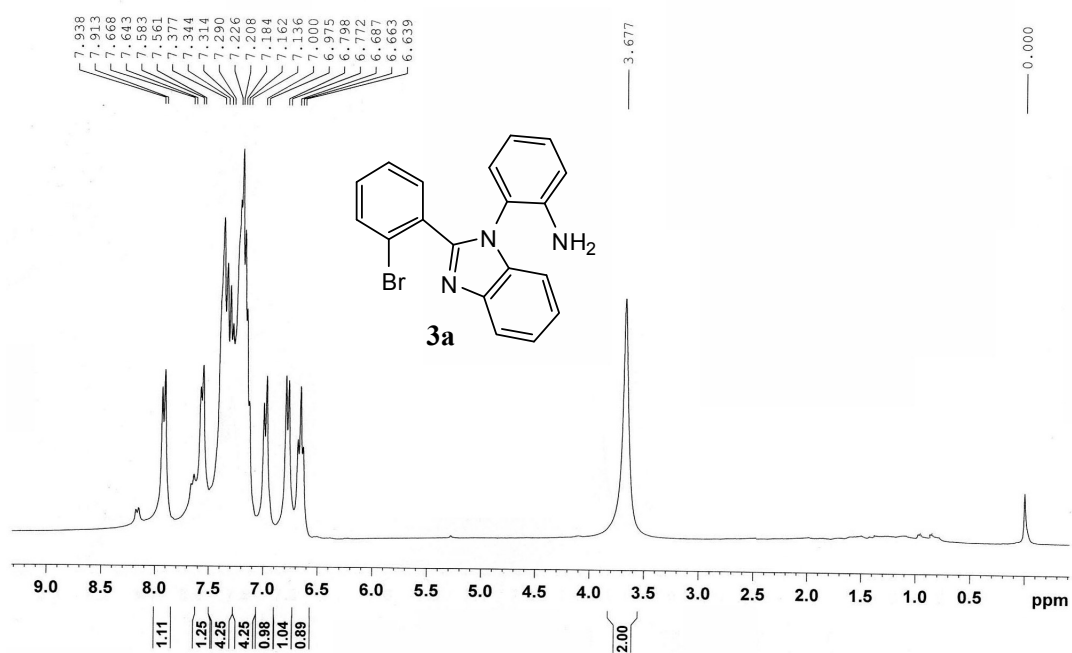

Figure S19  $^1\text{H NMR}$  of **3a**

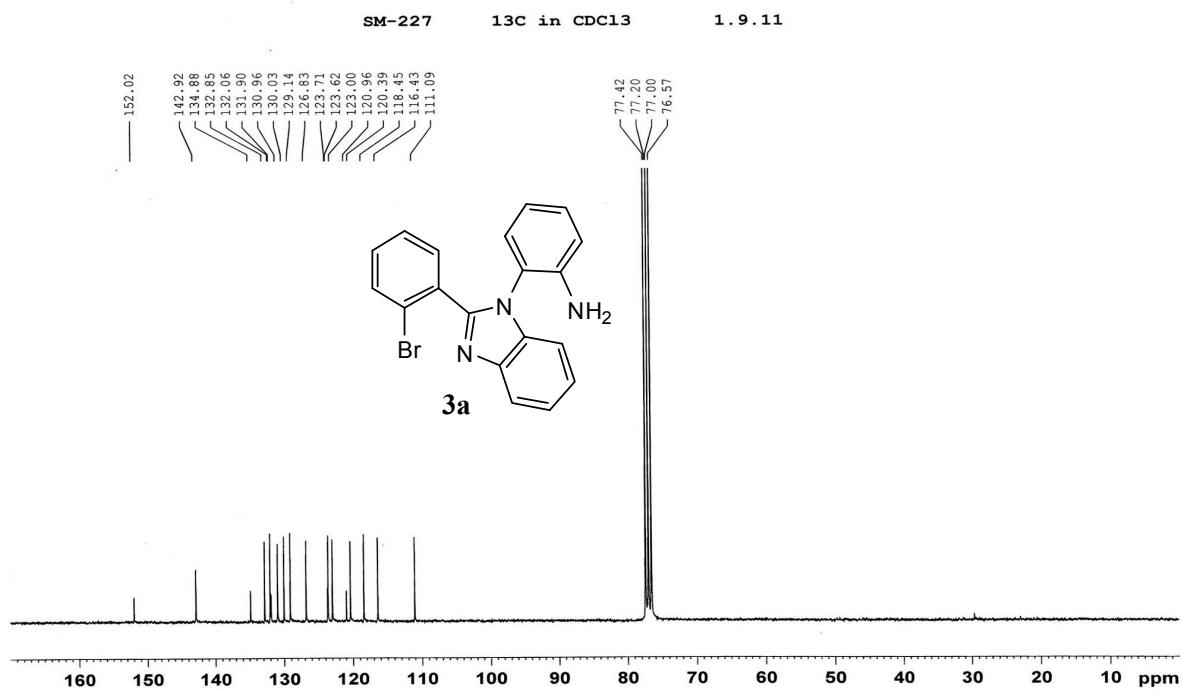

Figure S20  $^{13}\text{C NMR}$  of **3a**

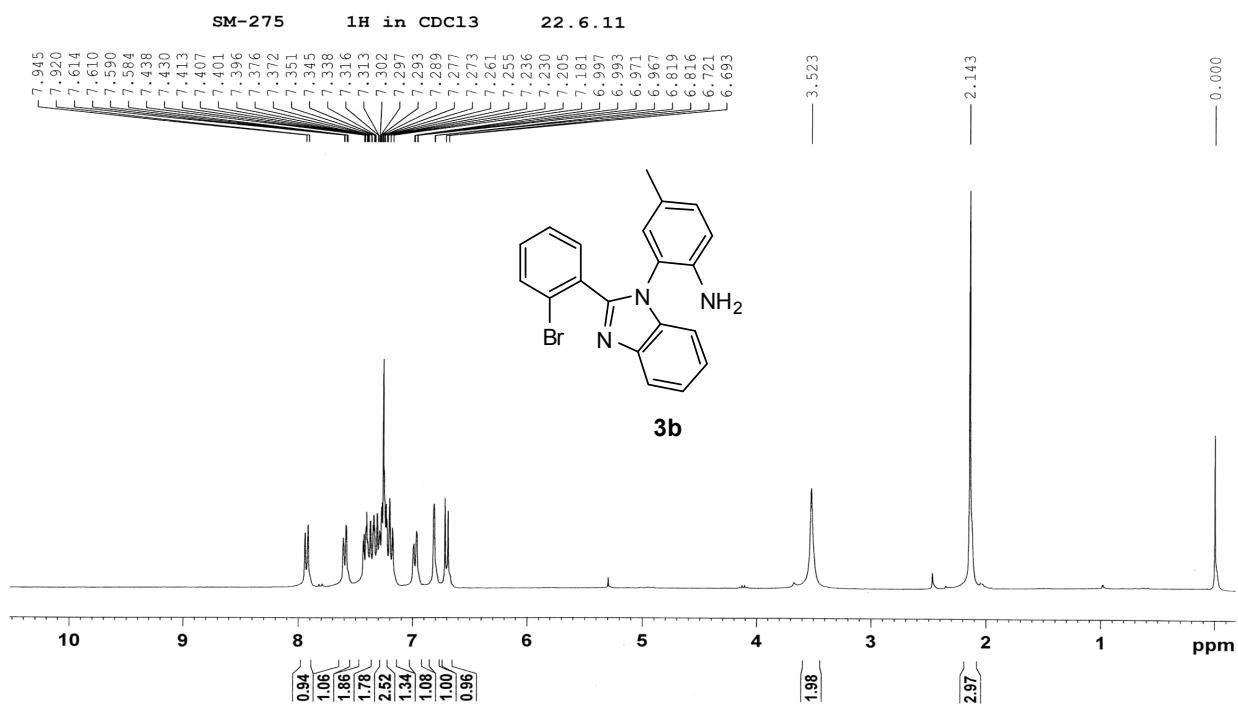

Figure S21 <sup>1</sup>H NMR of **3b**

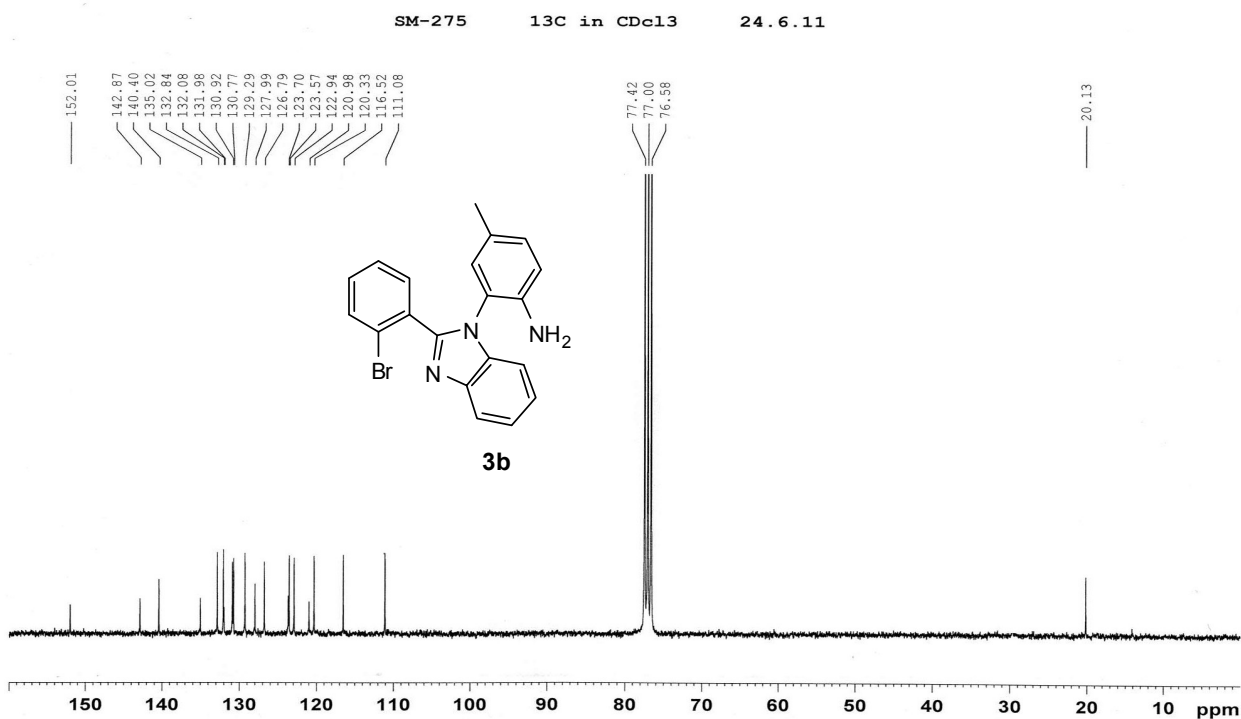

Figure S22 <sup>13</sup>C NMR of **3b**

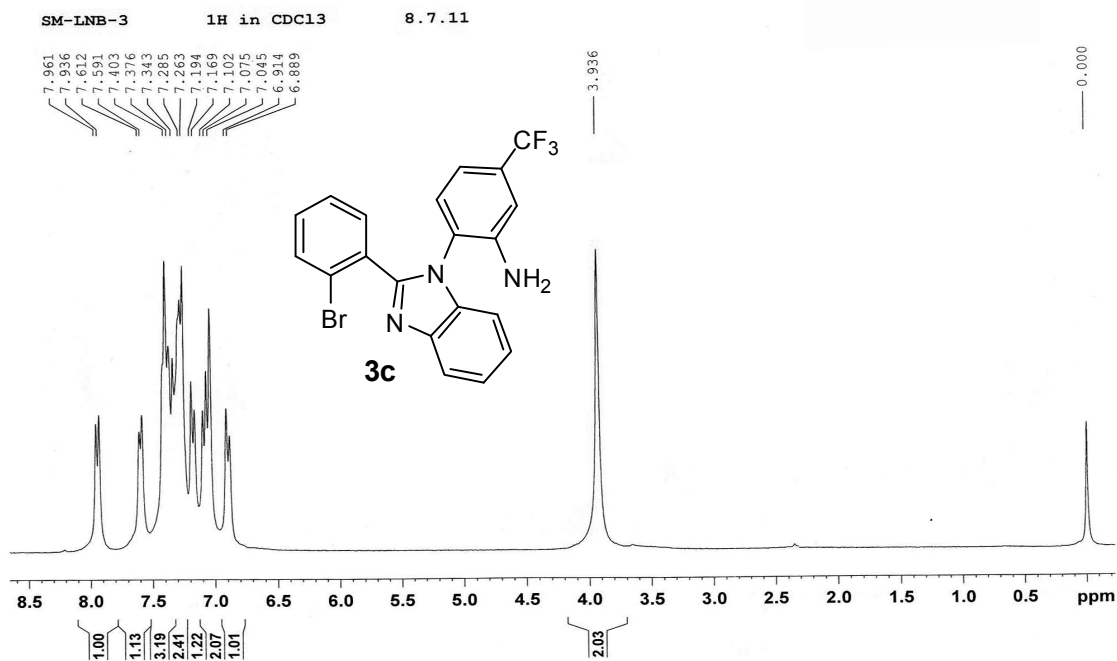

Figure S23 <sup>1</sup>H NMR of **3c**

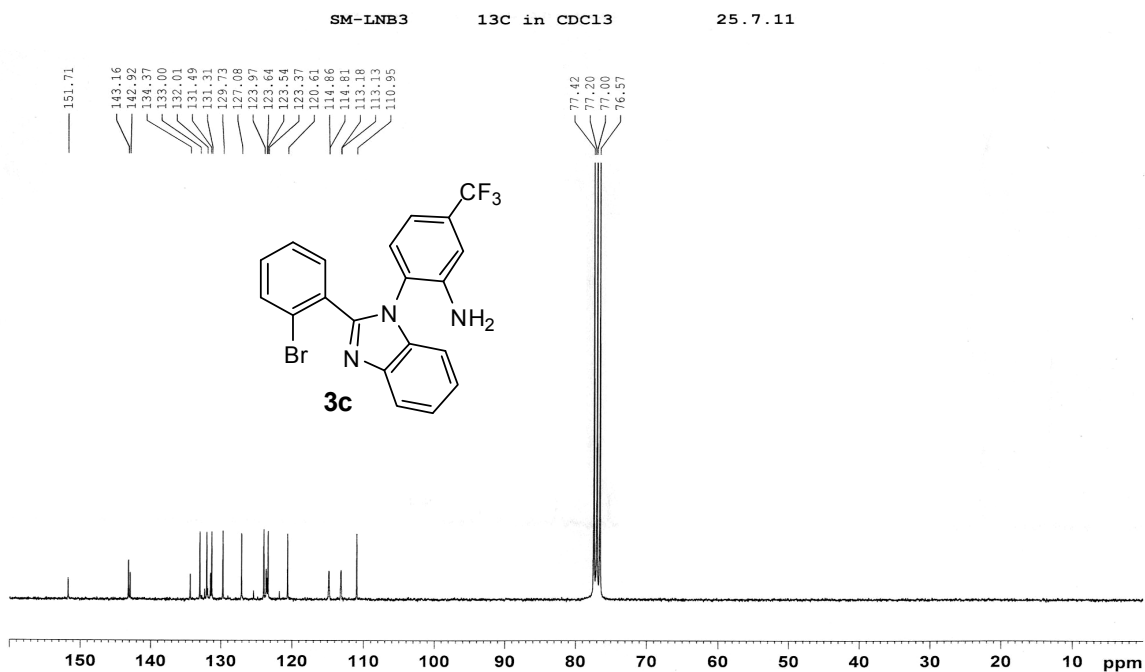

Figure S24 <sup>13</sup>C NMR of **3c**

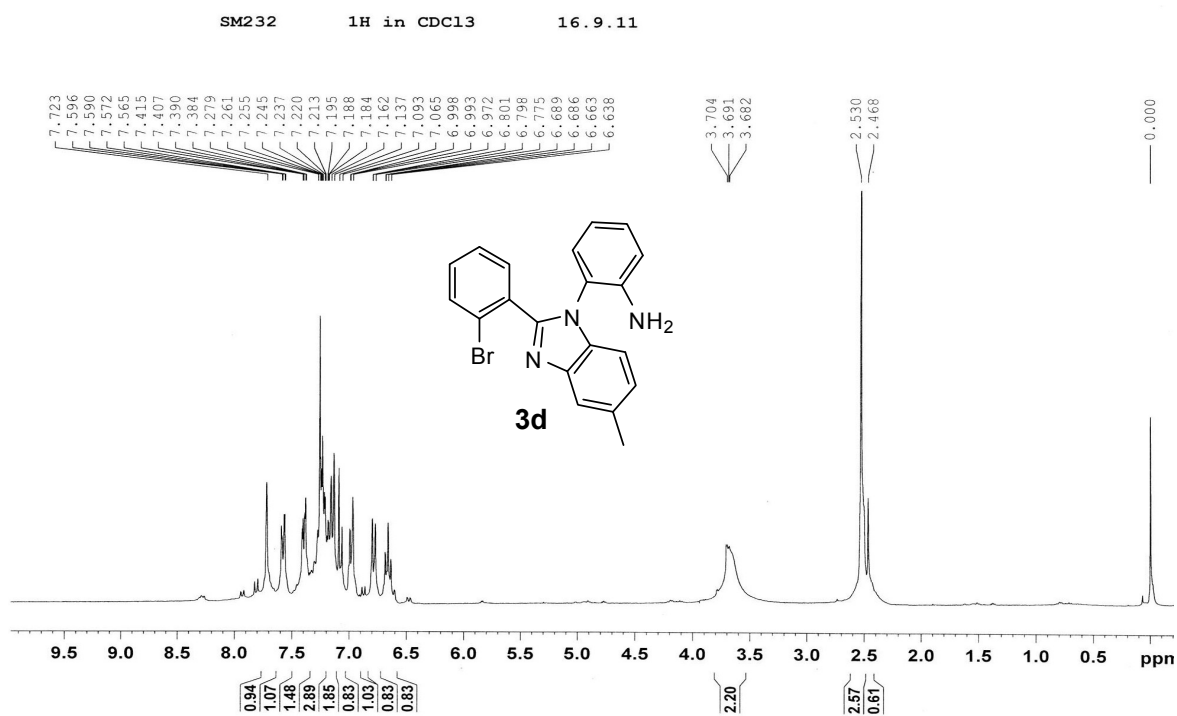

Figure S25  $^1\text{H}$  NMR of **3d**

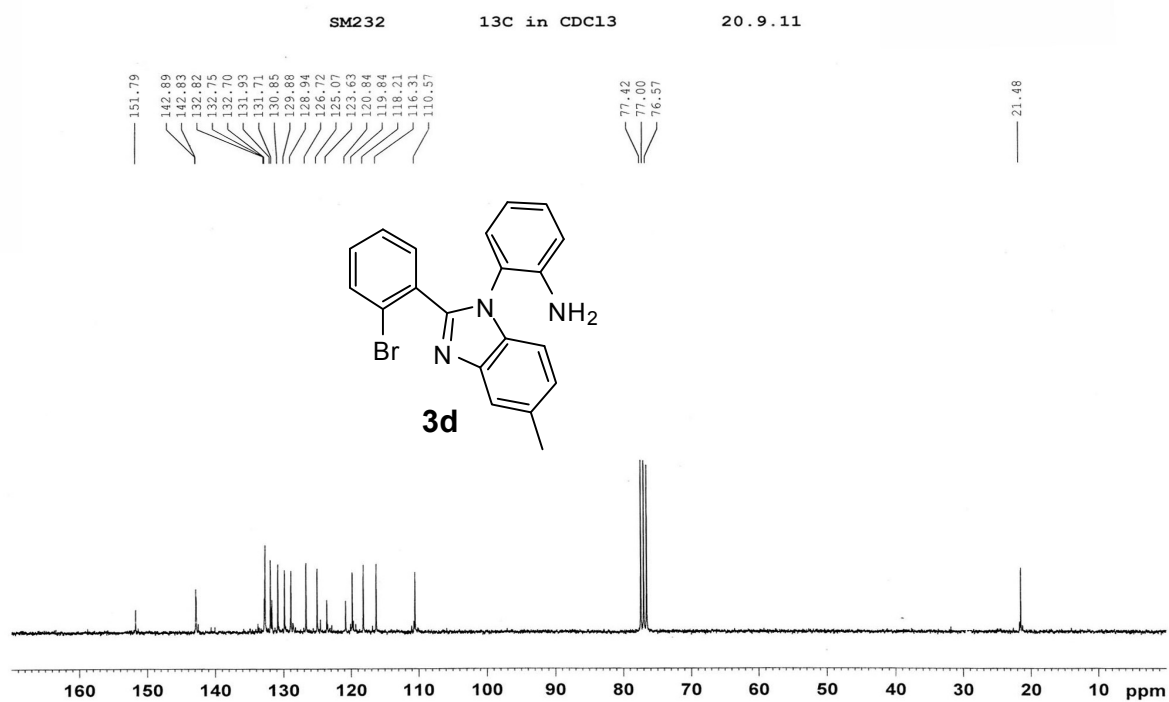

Figure S26  $^{13}\text{C}$  NMR of **3d**



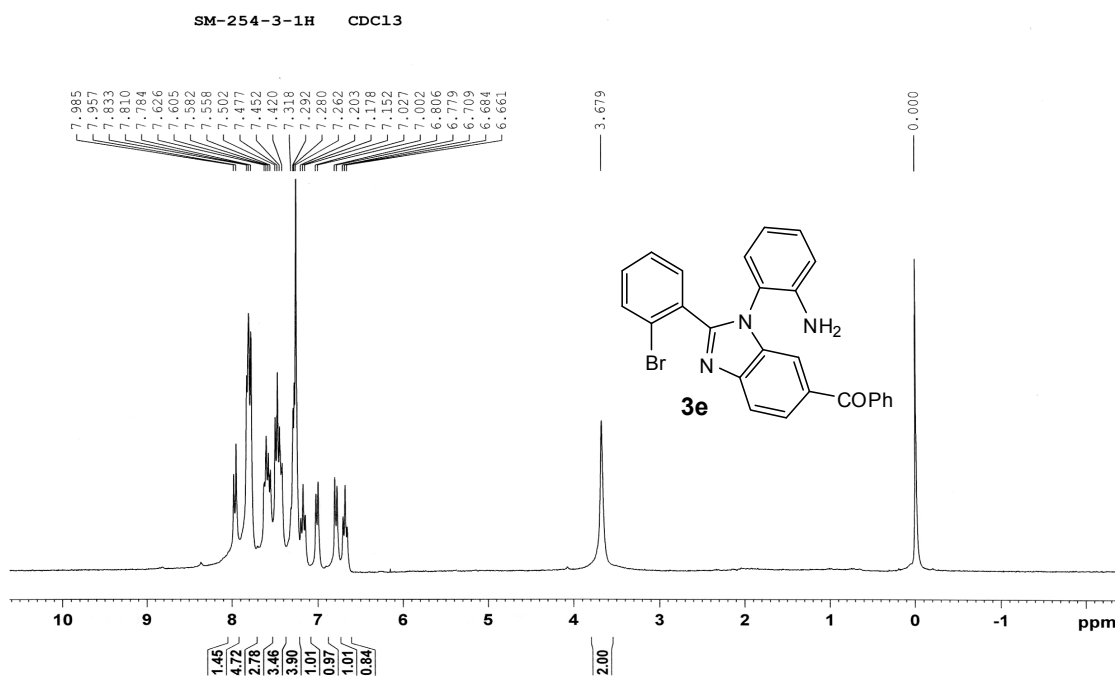

Figure S27  $^1\text{H}$  NMR of **3e**

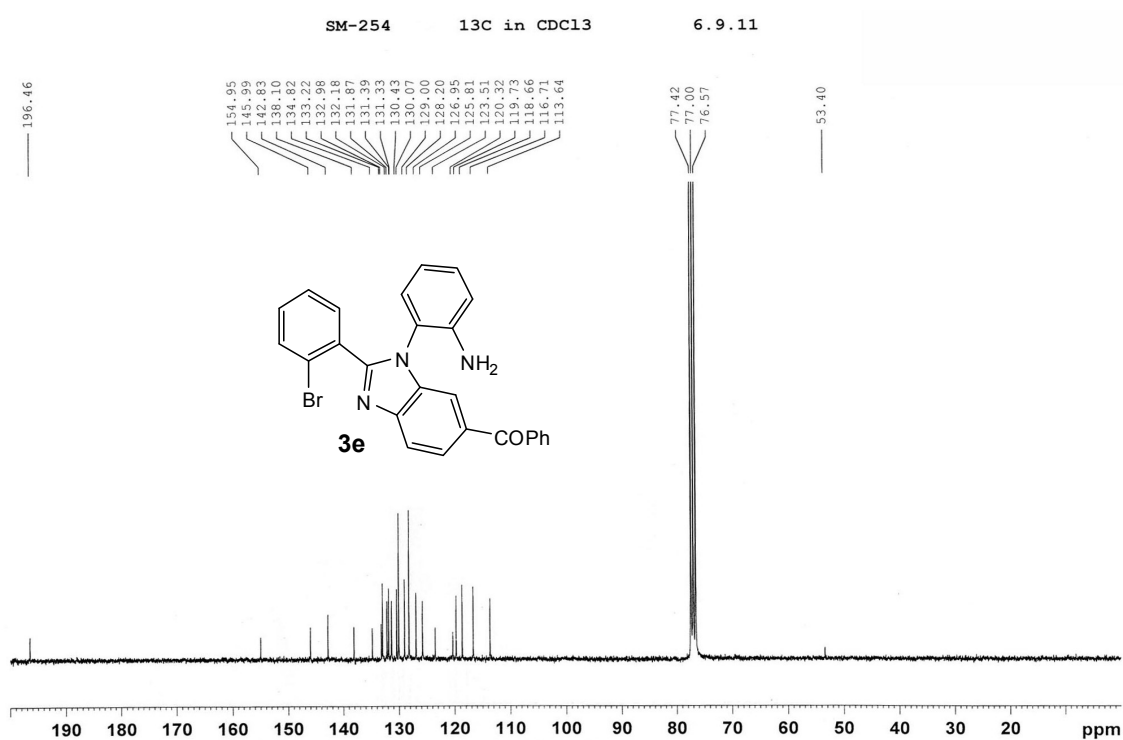

Figure S28  $^{13}\text{C}$  NMR of **3e**

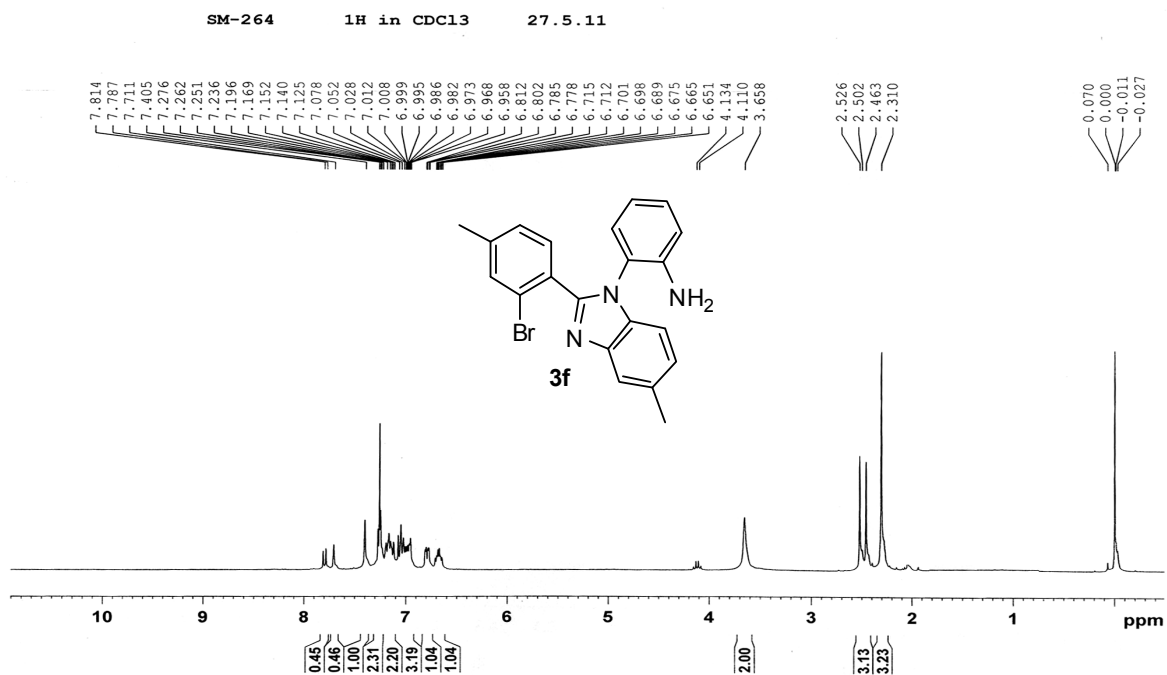

Figure S29 <sup>1</sup>H NMR of **3f**

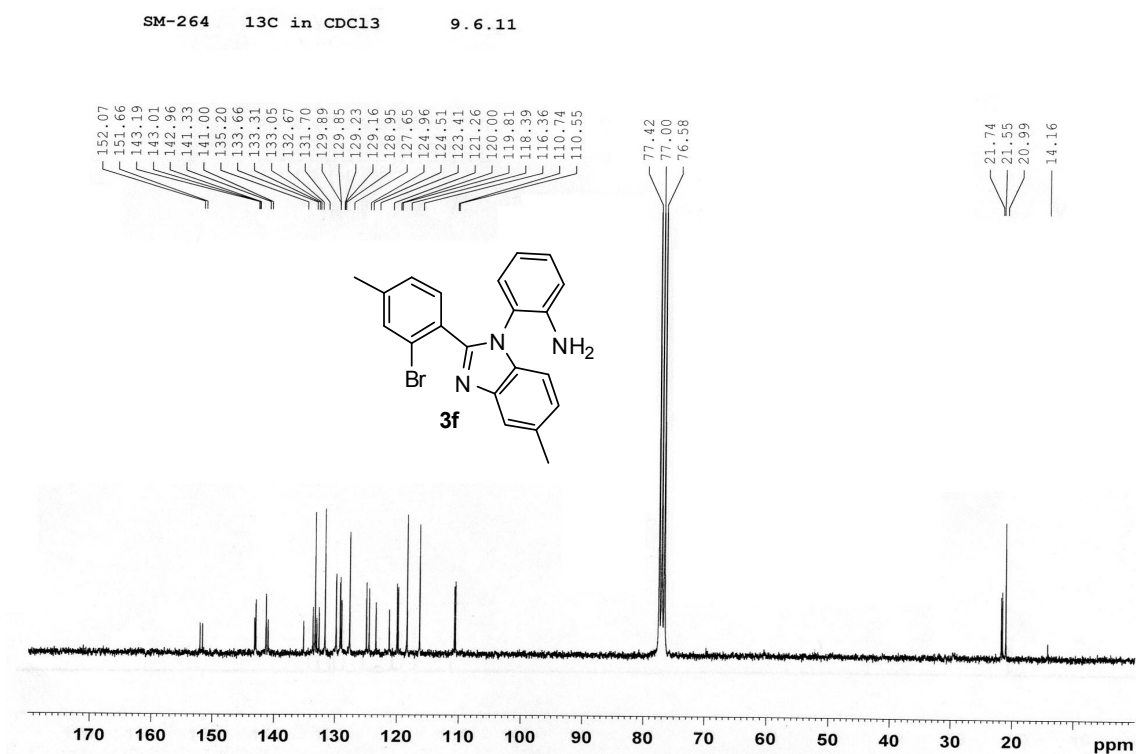

Figure S30 <sup>13</sup>C NMR of **3f**

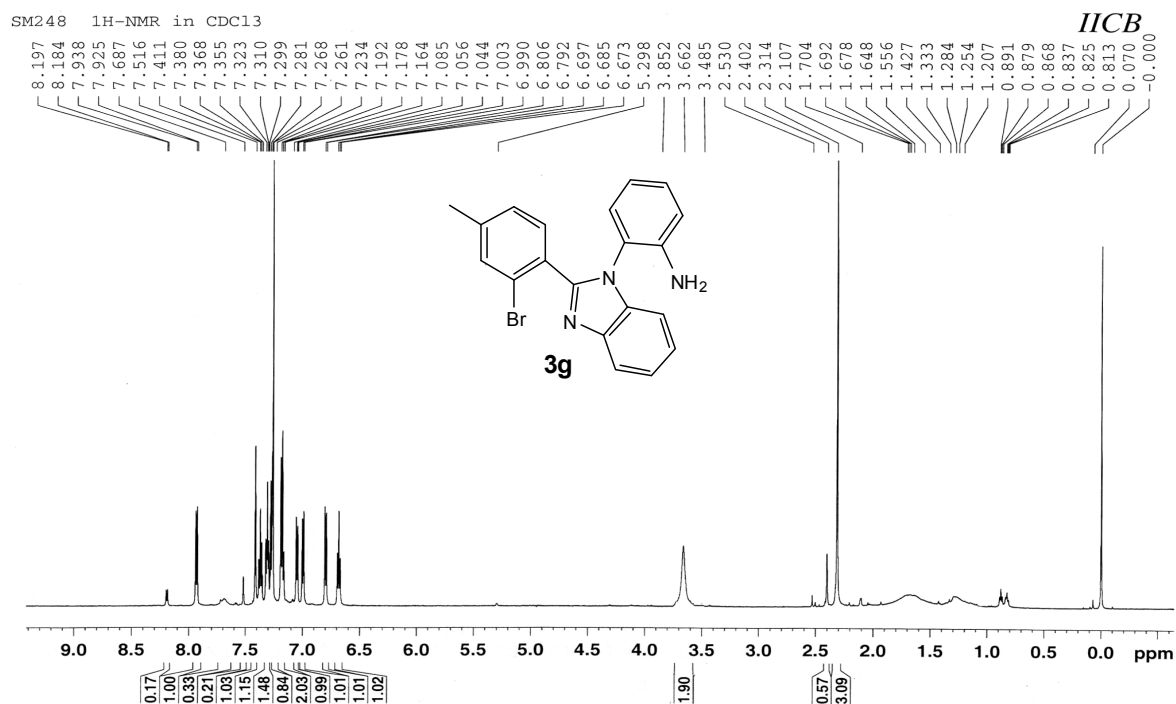

Figure S31 <sup>1</sup>H NMR of **3g**

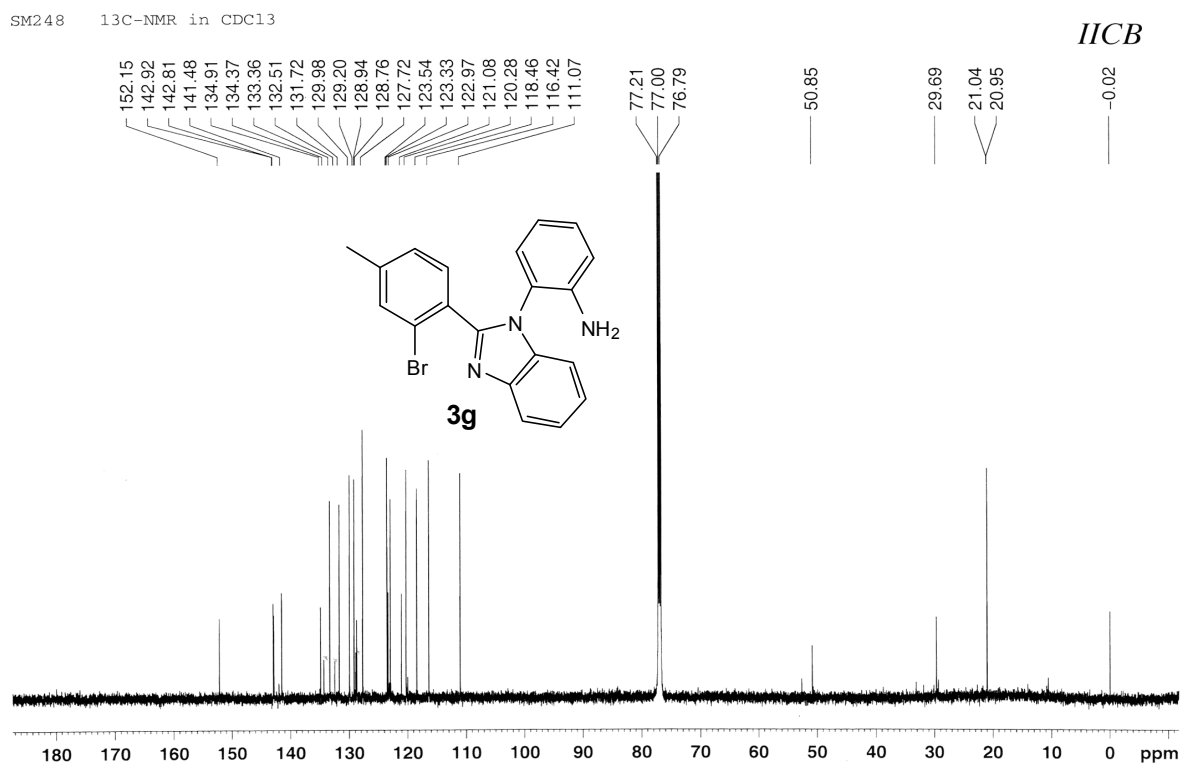

Figure S32 <sup>13</sup>C NMR of **3g**

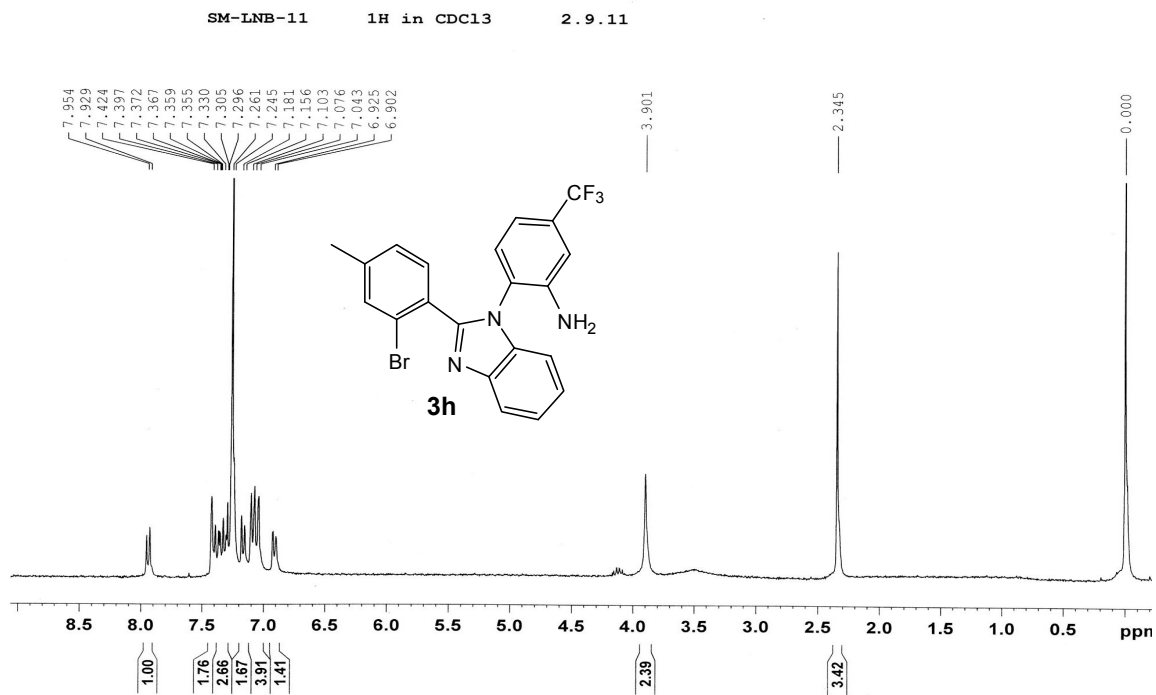

Figure S33  $^1\text{H}$  NMR of **3h**

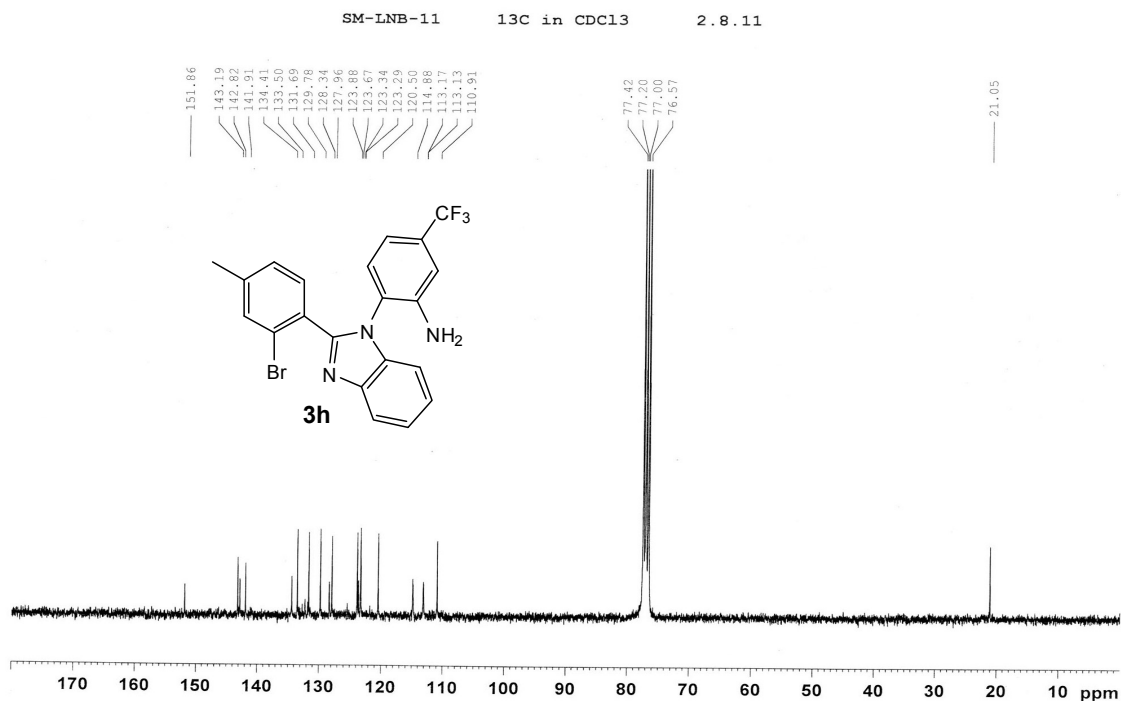

Figure S34  $^{13}\text{C}$  NMR of **3h**

SM-226 1H in CDCl3 17.1.11

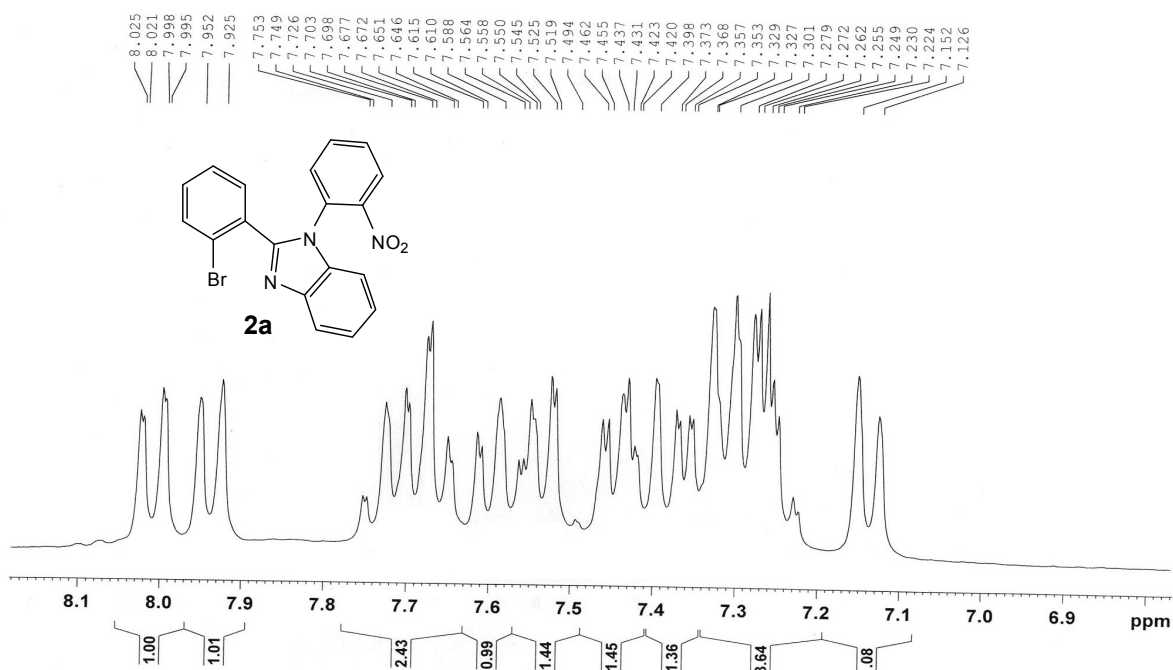

Figure S35 <sup>1</sup>H NMR of **2a**

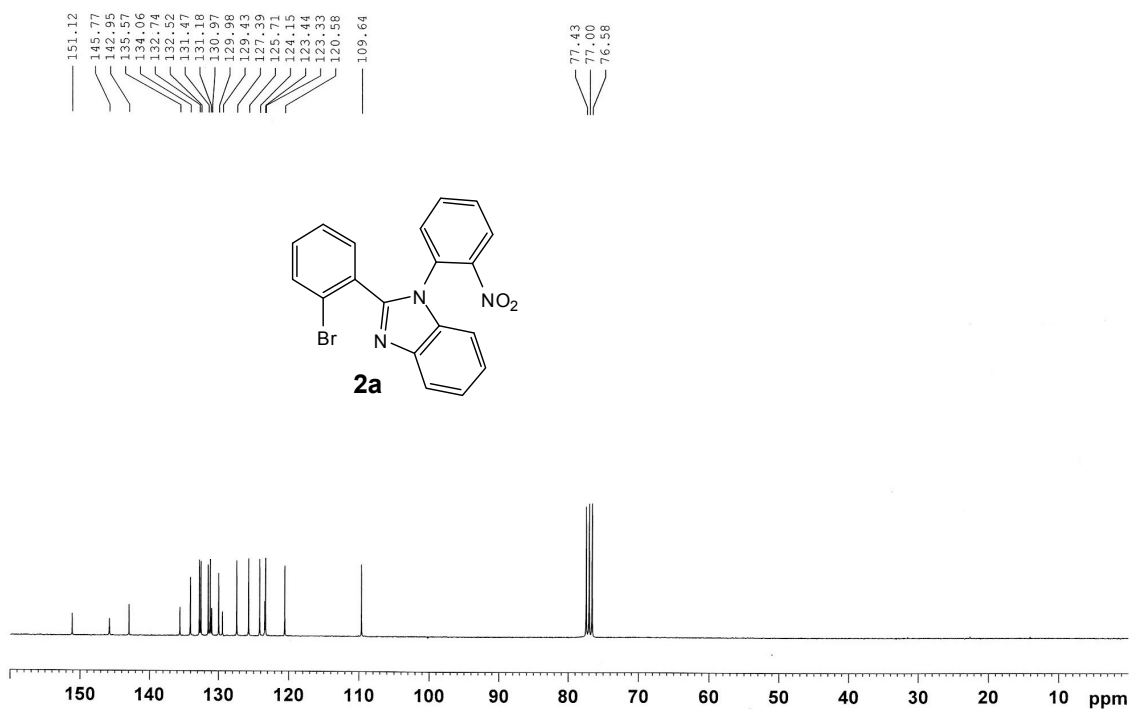

Figure S36 <sup>13</sup>C NMR of **2a**

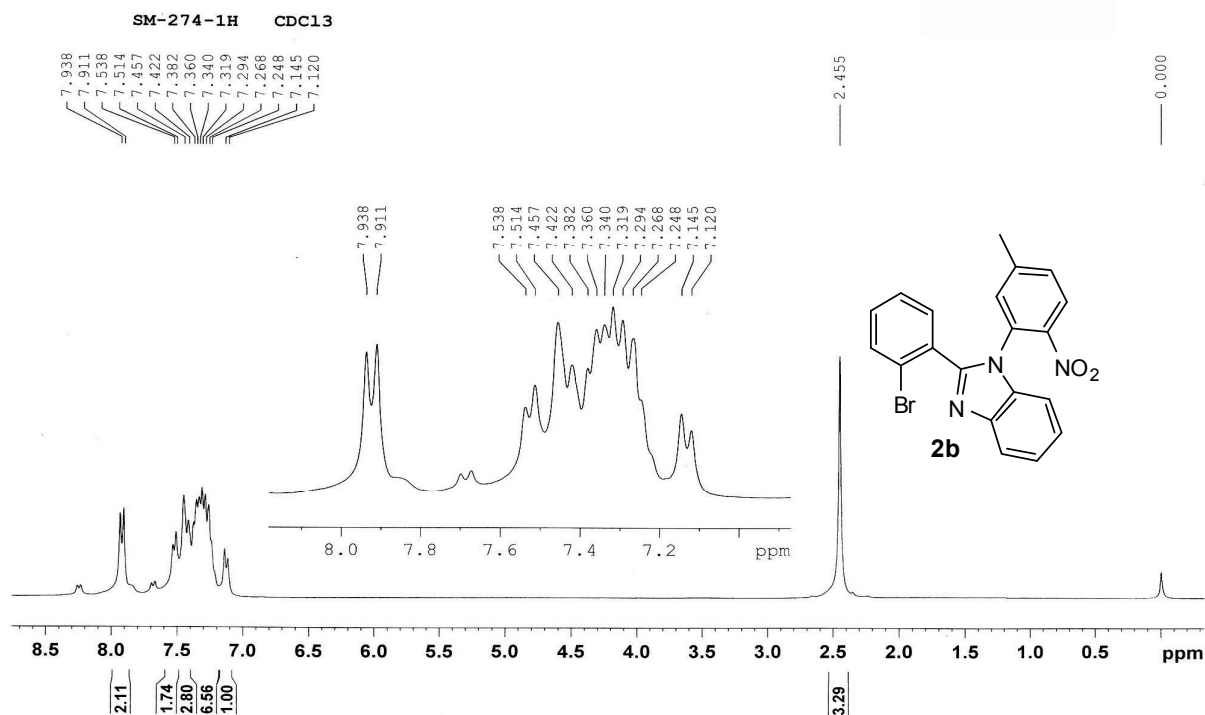

Figure S37 <sup>1</sup>H NMR of **2b**

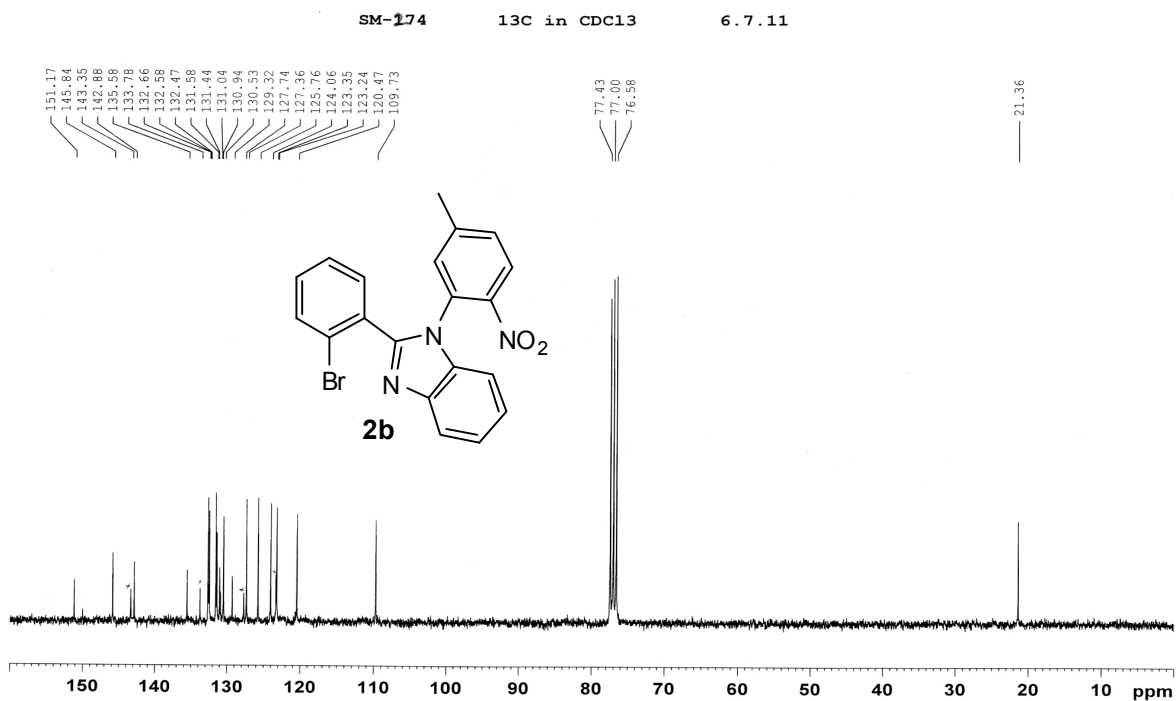

Figure S38 <sup>13</sup>C NMR of **2b**

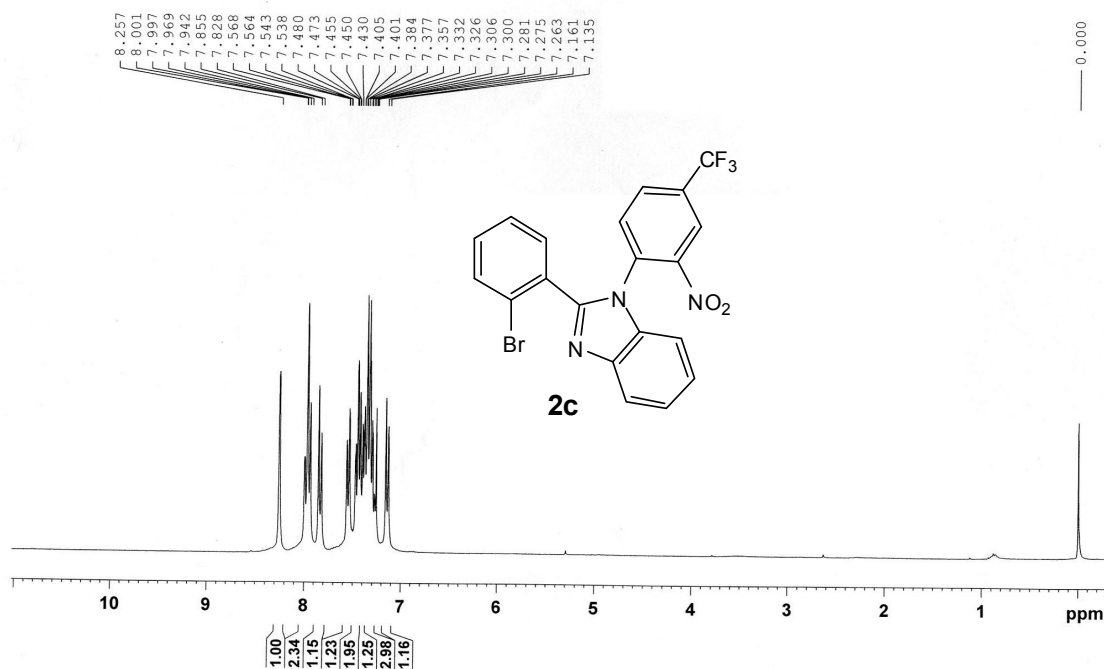

Figure S39  $^1\text{H}$  NMR of **2c**

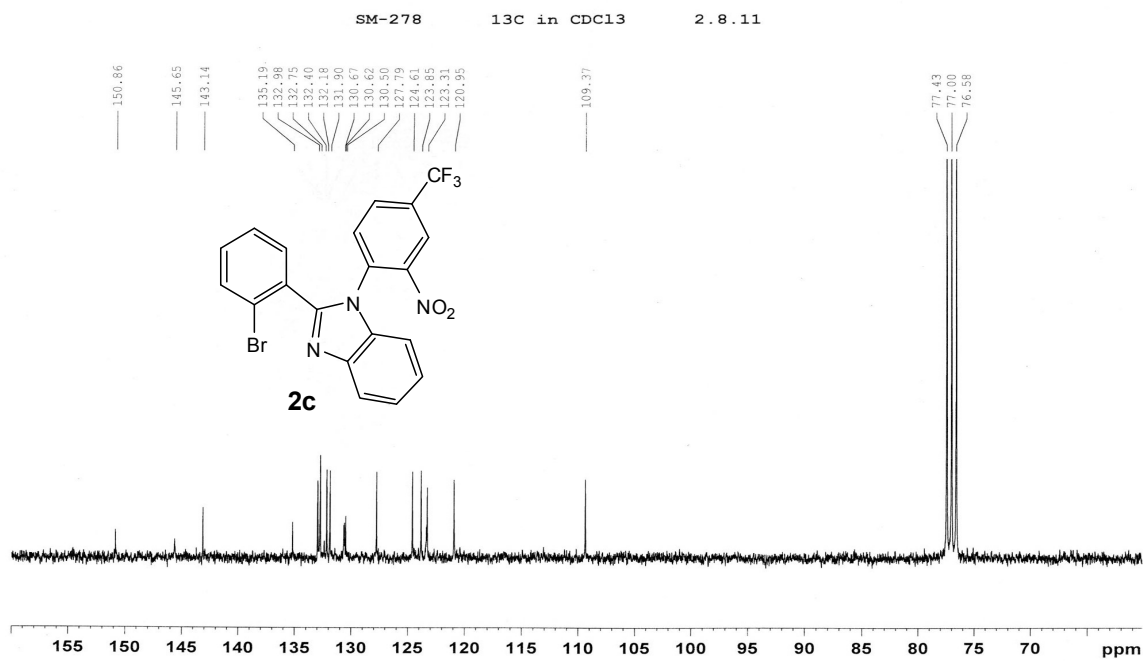

Figure S40  $^{13}\text{C}$  NMR of **2c**

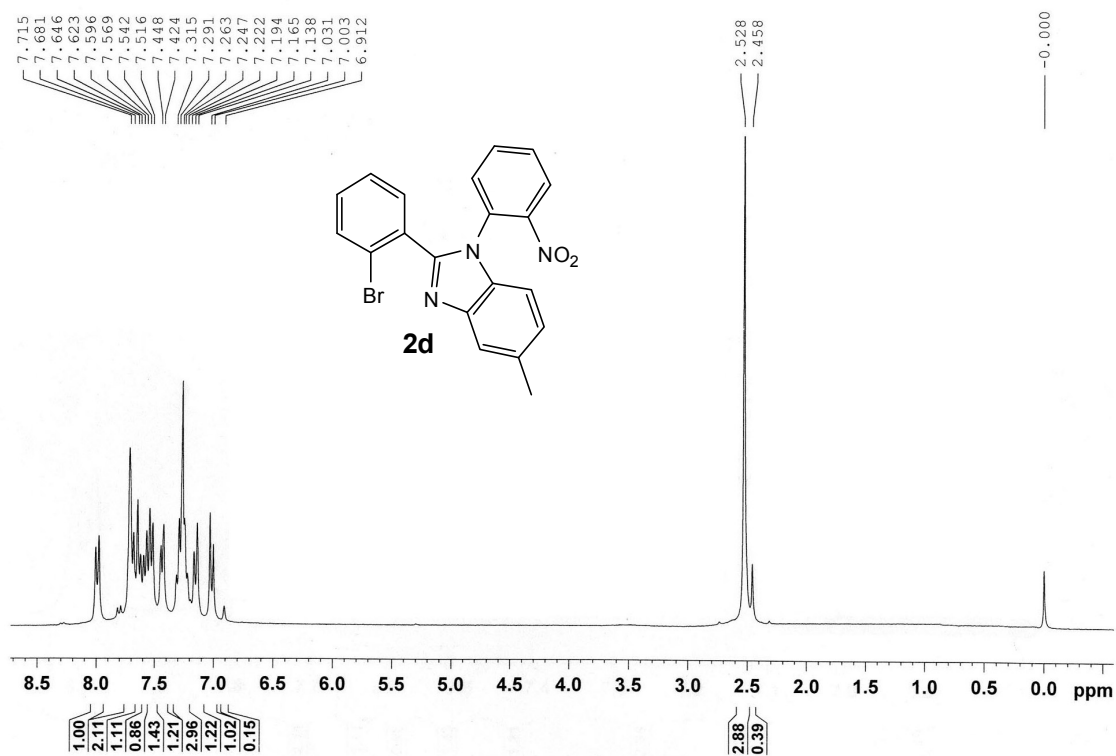

Figure S41  $^1\text{H}$  NMR of **2d**

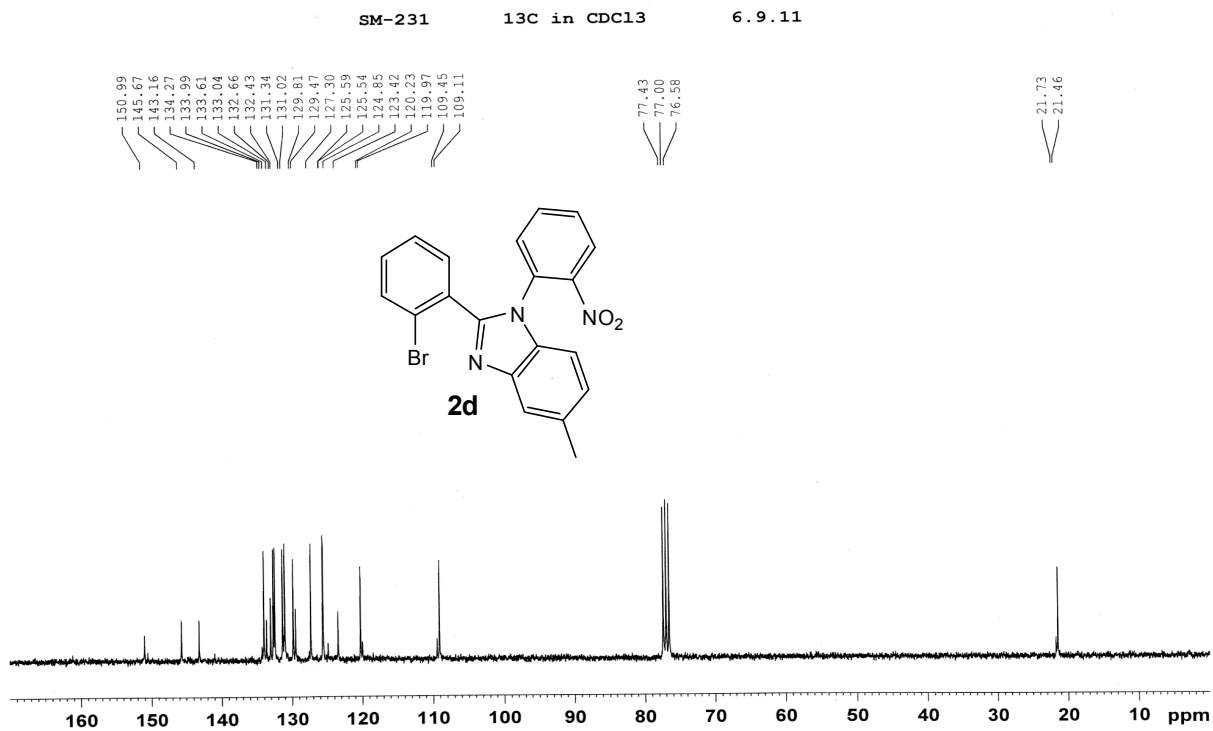

Figure S42  $^{13}\text{C}$  NMR of **2d**



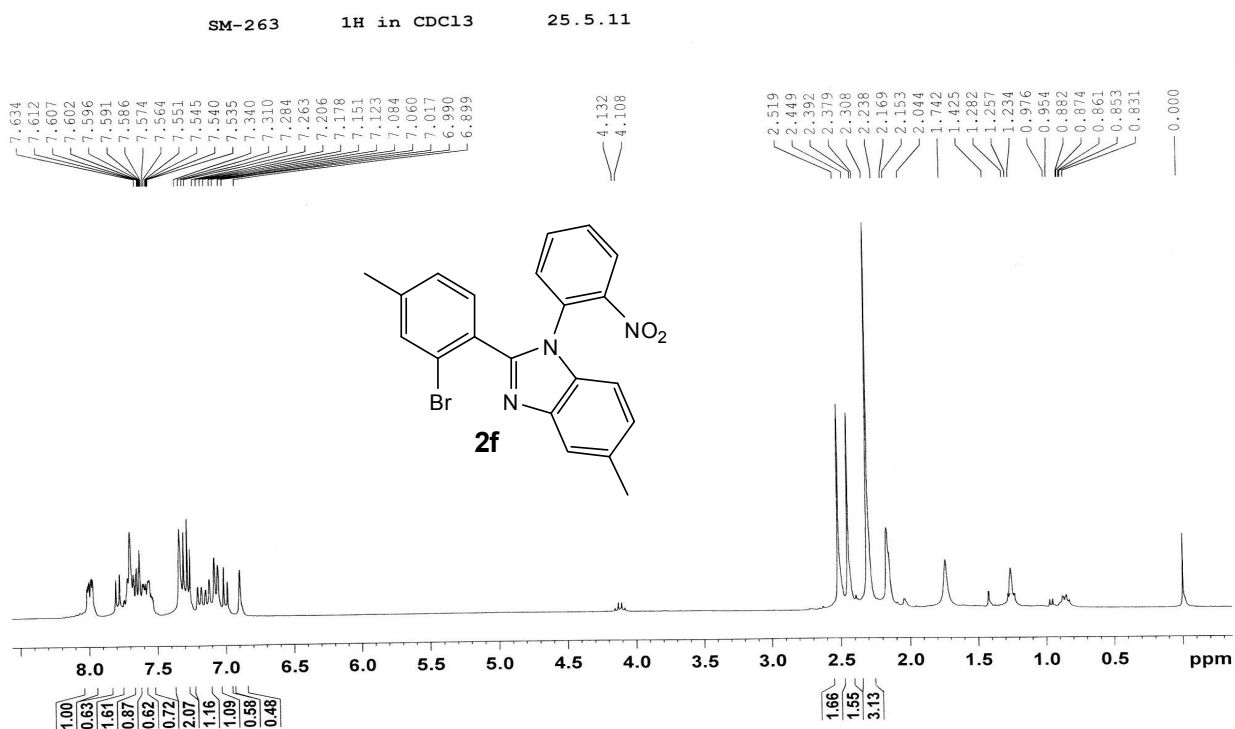

Figure S43 <sup>1</sup>H NMR of **2f**

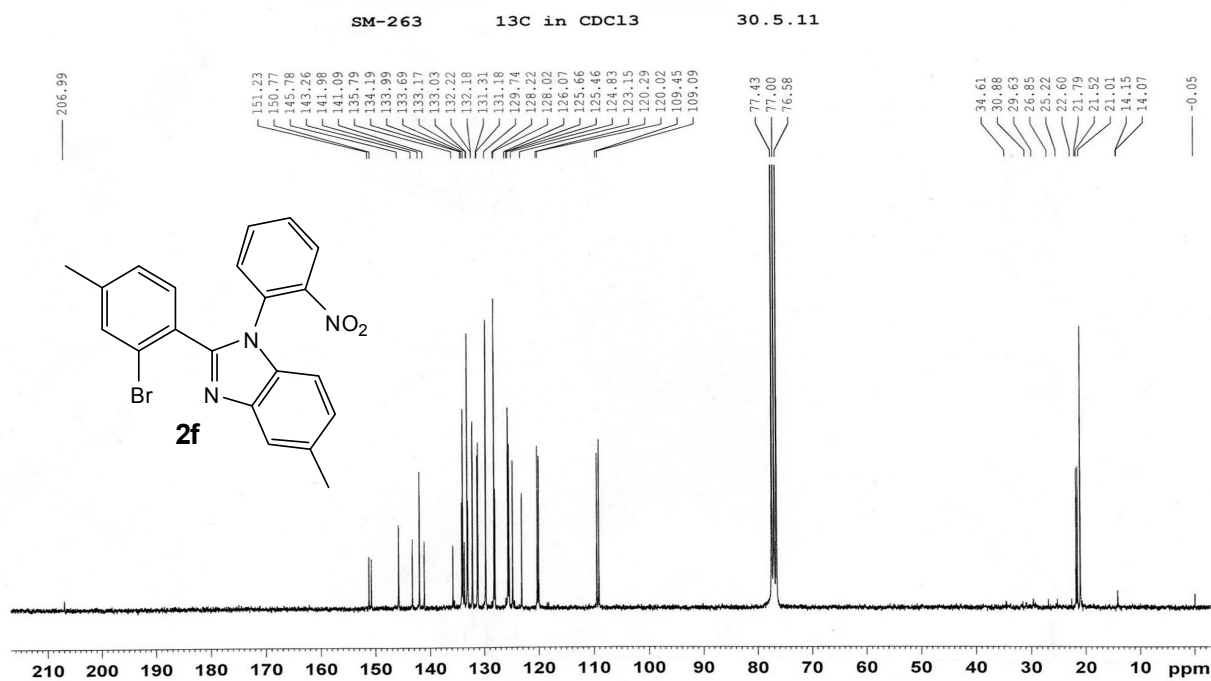

Figure S44 <sup>13</sup>C NMR of **2f**

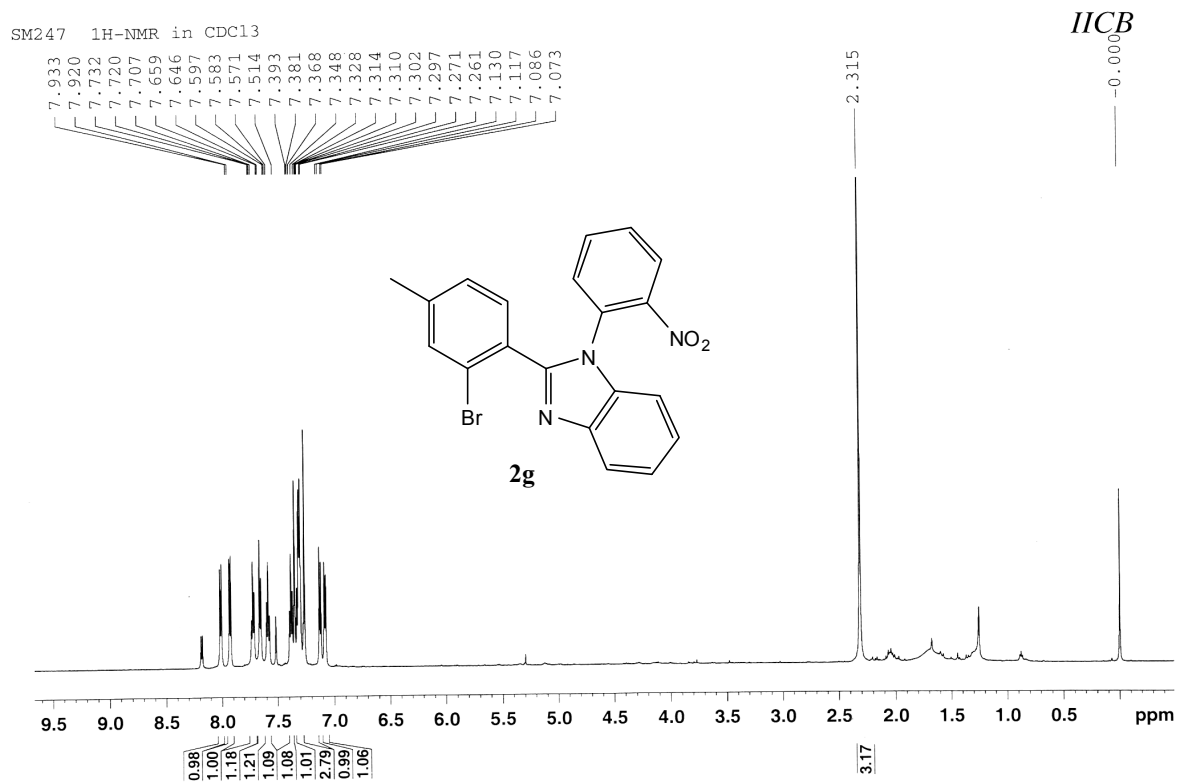

Figure S45 <sup>1</sup>H NMR of **2g**

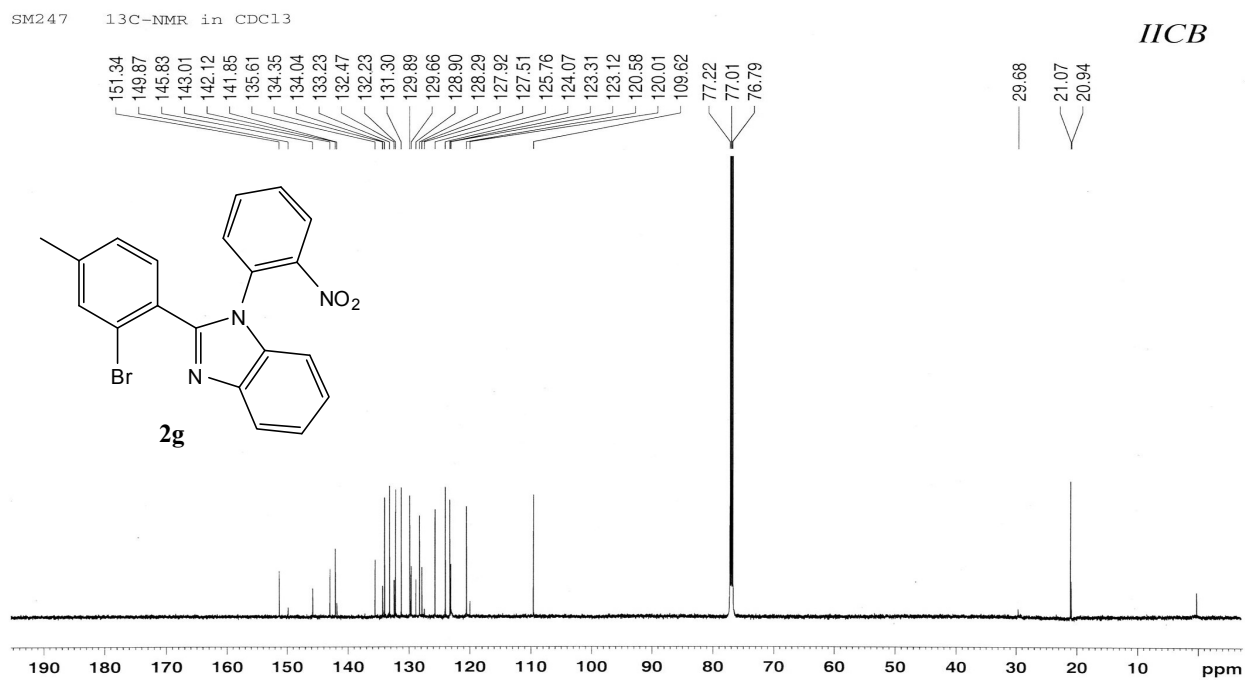

Figure S46 <sup>13</sup>C NMR of **2g**

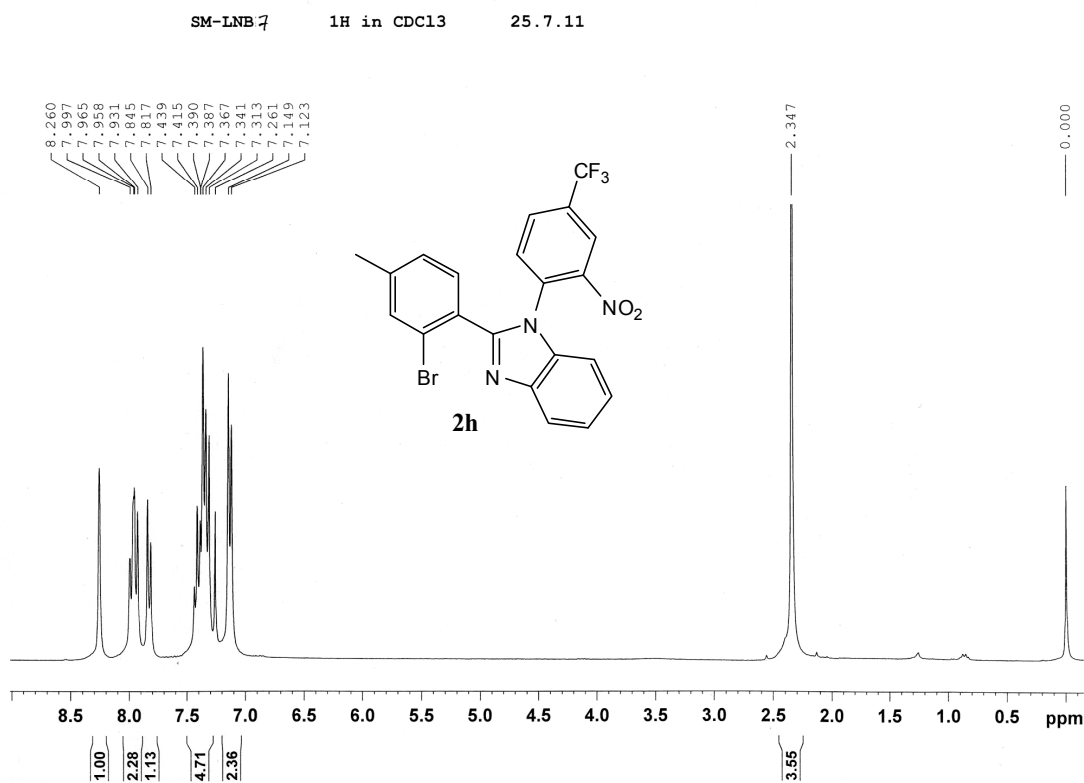

Figure S47 <sup>1</sup>H NMR of **2h**

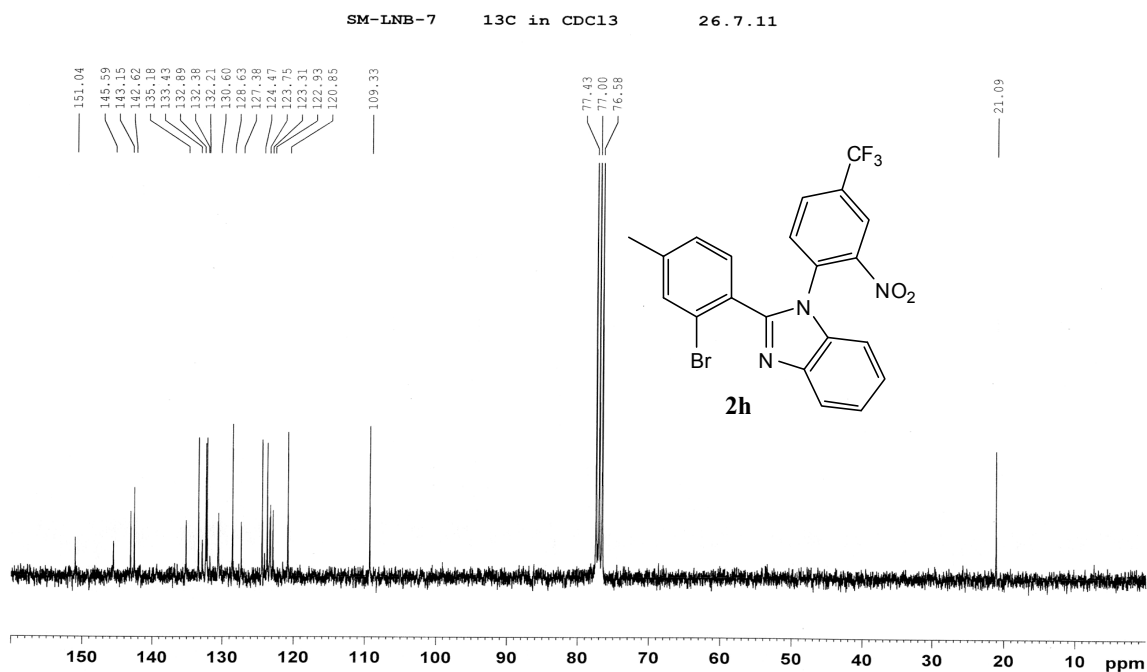

Figure S48 <sup>13</sup>C NMR of **2h**
